# Supplementary material for: Adolescent self-consent for vaccinations: protocol for a mixed methods systematic review
Source: PubMed Central journal article supplement (PMC5961593; doi:10.1136/bmjopen-2017-021335), 2018-05-20
Supplement: bmjopen-2017-021335.draft_revisions.pdf [file bmjopen-2017-021335.draft_revisions.pdf]

# BMJ Open

BMJ Open is committed to open peer review. As part of this commitment we make the peer review history of every article we publish publicly available.

When an article is published we post the peer reviewers' comments and the authors' responses online. We also post the versions of the paper that were used during peer review. These are the versions that the peer review comments apply to.

The versions of the paper that follow are the versions that were submitted during the peer review process. They are not the versions of record or the final published versions. They should not be cited or distributed as the published version of this manuscript.

BMJ Open is an open access journal and the full, final, typeset and author-corrected version of record of the manuscript is available on our site with no access controls, subscription charges or pay-per-view fees (<http://bmjopen.bmj.com>).

If you have any questions on BMJ Open's open peer review process please email [info.bmjopen@bmj.com](mailto:info.bmjopen@bmj.com)

# BMJ Open

## Adolescent self-consent for vaccinations: protocol for a mixed methods systematic review

|                               |                                                                                                                                                                                                                                                                                                                                                                                |
|-------------------------------|--------------------------------------------------------------------------------------------------------------------------------------------------------------------------------------------------------------------------------------------------------------------------------------------------------------------------------------------------------------------------------|
| Journal:                      | <i>BMJ Open</i>                                                                                                                                                                                                                                                                                                                                                                |
| Manuscript ID                 | bmjopen-2017-021335                                                                                                                                                                                                                                                                                                                                                            |
| Article Type:                 | Protocol                                                                                                                                                                                                                                                                                                                                                                       |
| Date Submitted by the Author: | 29-Dec-2017                                                                                                                                                                                                                                                                                                                                                                    |
| Complete List of Authors:     | Batista, Harriet; University of Bristol, Population Health Sciences: Bristol Medical School<br>Hickman, M; University of Bristol, Population Health Sciences: Bristol Medical School<br>Macleod, John; University of Bristol, Population Health Sciences: Bristol Medical School<br>Audrey, Suzanne; University of Bristol, Population Health Sciences: Bristol Medical School |
| Keywords:                     | Self-consent, Vaccination, Systematic review, Mixed methods, Adolescents                                                                                                                                                                                                                                                                                                       |
|                               |                                                                                                                                                                                                                                                                                                                                                                                |

SCHOLARONE™  
Manuscripts

Peer Review Only

1  
2  
3  
4  
5  
6  
7  
8  
9  
10  
11  
12  
13  
14  
15  
16  
17  
18  
19  
20  
21  
22  
23  
24  
25  
26  
27  
28  
29  
30  
31  
32  
33  
34  
35  
36  
37  
38  
39  
40  
41  
42  
43  
44  
45  
46  
47  
48  
49  
50  
51  
52  
53  
54  
55  
56  
57  
58  
59  
60

1 **TITLE: Adolescent self-consent for vaccinations: protocol for a mixed methods systematic review**

2

3 Dr Harriet Batista Ferrer, Population Health Sciences, Bristol Medical School, University of Bristol.

4 Professor Matthew Hickman, Population Health Sciences, Bristol Medical School, University of

5 Bristol.

6 Professor John Macleod, Population Health Sciences, Bristol Medical School, University of Bristol.

7 Dr Suzanne Audrey, Population Health Sciences, Bristol Medical School, University of Bristol.

8

9 **Corresponding author:**

10 Dr Harriet Batista Ferrer

11 Senior Research Associate

12 Population Health Sciences, Bristol Medical School

13 University of Bristol

14 Canynge Hall

15 Whatley Road

16 Bristol BS8 2PS

17 Email: Harriet.Batista@bristol.ac.uk

18 Telephone: +44 (0) 117 928 7223

19

20 **Word count: 2,219**

21

22 **Key words**

23 Self-consent, Vaccination, Systematic review, Adolescents, Mixed Methods

24

1  
2  
3 25 **ABSTRACT**

4  
5 26 **Introduction:** The recent global expansion of routine adolescent vaccination programmes has the  
6  
7 27 potential to protect young people against the acquisition of infectious disease and improve their  
8  
9 28 health. Although in many countries the legal framework supports young people to provide consent  
10  
11 29 for medical interventions if they are considered competent, written parental consent can act as a  
12  
13 30 barrier to uptake as it is frequently a condition of adolescent vaccination programmes. The aim of  
14  
15 31 this systematic review protocol is to document the methods which will be used to identify, appraise  
16  
17 32 and synthesise the available qualitative and quantitative evidence to address: (i) whether  
18  
19 33 implementation of adolescent self-consent procedures can increase vaccination uptake, and; (ii) the  
20  
21 34 barriers and facilitators to implementation of adolescent self-consent procedures.

22  
23  
24 35 **Methods and analysis:** Comprehensive search strategy of all relevant electronic databases for both  
25  
26 36 qualitative and quantitative studies using predefined inclusion and exclusion criteria. At least two  
27  
28 37 authors will independently review titles and abstracts, extract data and assess the methodological  
29  
30 38 quality of eligible primary studies, resolving disagreements by consensus. Quantitative studies will  
31  
32 39 be reported narratively and where possible pooled in a meta-analysis using a random-effects model.  
33  
34 40 The findings of qualitative primary studies will be extracted, interpreted and synthesised to identify  
35  
36 41 overarching themes as well as similarities and differences within those themes.

37  
38  
39 42 **Ethics and dissemination:** As this systematic review involves analysis of secondary data, the study  
40  
41 43 does not require ethical approvals. We will use our findings to assess whether the evidence supports  
42  
43 44 the hypothesis that self-consent procedures can increase coverage of adolescent vaccination  
44  
45 45 programmes. We will identify barriers and facilitators to the implementation of adolescent self-  
46  
47 46 consent for vaccination, and make recommendations for policy-makers and practitioners in relation  
48  
49 47 to consent procedures within vaccination programmes for young people.

50  
51 48 **Systematic review registration:** PROSPERO CRD42017084509

52  
53 49 **Word count:** 284

54  
55 50

1  
2  
3 51 **Strengths and limitations of this study**  
4

- 5 52 • The mixed methods systematic review will answer complementary research questions about  
6  
7 53 self-consent for adolescent vaccination programmes  
8  
9 54 • Robust systematic review methodology will be used to identify, appraise and synthesise the  
10  
11 55 relevant qualitative and quantitative literature  
12  
13 56 • Improvement to uptake of adolescent vaccination programmes by introduction of self-consent  
14  
15 57 procedures will be assessed in quantitative studies  
16  
17 58 • Synthesis of qualitative studies will examine barriers and facilitators to self-consent for  
18  
19 59 adolescent vaccination programmes  
20  
21 60 • Findings from this mixed-methods systematic review will inform recommendations for future  
22  
23 61 policy and practice  
24  
25  
26  
27  
28  
29  
30  
31  
32  
33  
34  
35  
36  
37  
38  
39  
40  
41  
42  
43  
44  
45  
46  
47  
48  
49  
50  
51  
52  
53  
54  
55  
56  
57  
58  
59  
60

## 63 INTRODUCTION

64 In recent years, the number of routine vaccinations recommended during adolescence have  
65 increased, and include vaccines that protect against tetanus, diphtheria, meningitis and human  
66 papillomavirus (HPV) acquisition [1, 2]. Provided sufficient coverage is achieved, the expansion of  
67 adolescent vaccination programmes may improve young people's health by protecting them from  
68 potentially life- threatening infectious diseases.

69  
70 The introduction of new adolescent vaccination programmes is relevant to the debate about young  
71 people's capacity to provide consent to receive medical treatment. The United Nations Convention  
72 on the Rights of the Child recognises the right for all children and young people to participate in  
73 decision-making processes which involve them [3]. However, the World Health Organisation (WHO)  
74 has acknowledged difficulties over consent for vaccination of adolescents because of their age, and  
75 describes current practice through which countries are encouraged to adopt procedures that ensure  
76 parents have been informed and agreed to the vaccination [4].

77  
78 In most countries, the legal framework for consent requires parental or guardian permission for  
79 young people aged below 18 years [4]. However, the age of consent for medical interventions, such  
80 as vaccination programmes, is lower in some countries. In the United Kingdom (UK), Canada and  
81 Sweden young women are legally able to override parental decisions if they are considered mature  
82 enough to make, and understand the consequences of, the decision to vaccinate. In Australia and  
83 the United States of America (USA) there are geographic variations of the age (12 to 17 years) that a  
84 young person can consent to be vaccinated. Despite young people being supported by the law to  
85 provide consent themselves, written parental consent is usually sought. In relation to the HPV  
86 vaccination programme, this has been shown to act as an important barrier preventing young  
87 women (usually aged 12 to 13 years) receiving the Human Papillomavirus (HPV) vaccine, with

1  
2  
3 88 implications for vaccination programme coverage [5, 6]. Furthermore, it is a barrier with potential to  
4  
5 89 reinforce health inequalities since lack of written parental consent may also be related to lower  
6  
7 90 socioeconomic status and some ethnic groups [5, 7].  
8  
9

10 91 To examine the issue of self-consent for the HPV vaccine in more detail, a mixed-methods study has  
11  
12 92 been funded by the National Institute for Health Research (NIHR) Research for Patient Benefit  
13  
14 93 Programme (RfPB) in England. The study is examining the practicality, acceptability and impact of  
15  
16 94 implementing new self-consent procedures for the schools-based HPV vaccination in two local  
17  
18 95 authorities in the south-west of England [8]. There are three elements to the study: statistical  
19  
20 96 analyses of routine data to assess the impact of self-consent on overall uptake levels and in relation  
21  
22 97 to socio-economic status, ethnicity and type of school; a process evaluation to examine the context,  
23  
24 98 implementation and response to the new consent procedures, and; a systematic review of the  
25  
26 99 evidence relating to self-consent for adolescent vaccines. The current protocol focusses on the  
27  
28 100 systematic review which will run alongside, and inform, the other elements of the study.  
29  
30

31 101

32  
33 102 An initial scoping search suggested a paucity of peer-reviewed evidence in relation to self-consent  
34  
35 103 procedures for HPV vaccination programmes. Since issues relating to self-consent for the HPV  
36  
37 104 vaccination are likely to be relevant for other vaccinations delivered during adolescence we widened  
38  
39 105 the scope of the systematic review to identify and collate the evidence across all adolescent  
40  
41 106 vaccination programmes. We chose to restrict to vaccination programmes, rather than include  
42  
43 107 studies related to healthcare in general, to ensure the findings were relevant to the programme of  
44  
45 108 research described above. Therefore, the aim of this mixed-methods systematic review is to identify,  
46  
47 109 appraise and synthesise the available qualitative and quantitative literature to gain understanding as  
48  
49 110 to: (i) whether implementation of adolescent self-consent procedures can increase vaccination  
50  
51 111 uptake, and; (ii) the related barriers and facilitators to implementation of adolescent self-consent  
52  
53 112 procedures.  
54  
55

56 113  
57  
58  
59  
60

1  
2  
3 114 **METHODS AND ANALYSIS**  
4

5 115 We are using mixed methods methodology within this systematic review to answer complementary  
6  
7 116 research questions within one study. In addition to answering questions of the effectiveness of self-  
8  
9 117 consent interventions at increasing uptake of adolescent vaccination programmes, the systematic  
10  
11 118 review will also synthesise qualitative research comprising the views of young people and relevant  
12  
13 119 stakeholders to gain understanding of how self-consent procedures can be implemented effectively  
14  
15 120 to increase uptake [9]. The findings from the qualitative and quantitative studies will be integrated  
16  
17 121 to produce recommendations for future policy and practice [9].  
18

19  
20 122

21  
22 123 This review protocol was prepared using the Preferred Reporting Items for Systematic Reviews and  
23  
24 124 Meta-Analyses (PRISMA) Protocol guidelines [10] (Supplementary file 1) and has been registered  
25  
26 125 with the International Prospective Register of Systematic Reviews (PROSPERO) (Registration  
27  
28 126 number: CRD42017084509).  
29

30 127

31  
32 128 **Search strategy**  
33

34 129 A comprehensive search strategy has been developed to capture all literature relevant to adolescent  
35  
36 130 self-consent procedures for vaccination programmes by a reviewer (HB-F) experienced in  
37  
38 131 undertaking systematic reviews in the proposed research field and discussed with members of the  
39  
40 132 research team. The original search strategy developed for the Embase database has been adapted  
41  
42 133 for each included database (see below) and comprises a combination of text words and the  
43  
44 134 following medical subject headings (MeSH) indexing terms: 'child', 'adolescent', 'active  
45  
46 135 immunization', 'immunization', 'immunization programs', 'mass immunization', 'revaccination',  
47  
48 136 'vaccination', 'diphtheria vaccine', 'diphtheria tetanus vaccine', 'diphtheria pertussis tetanus',  
49  
50 137 'haemophilus influenzae type b vaccine', 'hepatitis b vaccine', 'meningococcus vaccine', 'rubella  
51  
52 138 vaccine', 'wart virus vaccine', 'papillomavirus vaccines', 'decision making', 'informed consent',  
53  
54  
55  
56  
57  
58  
59  
60



1  
2  
3 139 'parental consent', 'treatment refusal' (Table 1). Study design filters will not be applied as diverse  
4  
5 140 study designs are eligible for inclusion.

6  
7 141

8  
9 142 **Databases**

10  
11 143 To ensure all the relevant literature is captured, we will search the following ten databases from  
12  
13 144 inception to January 2018 and re-run six months later (June 2018) to inform the wider research  
14  
15 145 study as it progresses: Child Development & Adolescent Studies via EBSCOhost, Cochrane Central  
16  
17 146 Register of Controlled Trials via The Cochrane Library, Cochrane Reviews via The Cochrane Library,  
18  
19 147 Cumulative Index to Nursing and Allied Health Literature via EBSCOhost, Embase via Ovid, Health  
20  
21 148 Technology Assessment Database, Medline via Ovid, PsycINFO via Ovid, Social Care Online via Social  
22  
23 149 Care Institute for Excellence and Web of Science Core Collection: Social Sciences Citation Index and  
24  
25 150 Conference Proceedings Citation Index- Science. All abstracts will be saved using Endnote X8.

26  
27  
28 151

29  
30 152 **Inclusion and exclusion criteria**

31  
32 153 Quantitative studies will be eligible if vaccine uptake following implementation of self-consent  
33  
34 154 procedures is reported for young people aged between ten and 18 years [11]. Qualitative studies  
35  
36 155 reporting the views and experiences of key stakeholder in relation adolescent self-consent  
37  
38 156 procedures will also be included. Relevant stakeholders will vary with context but are likely to  
39  
40 157 include young people, parents or primary care givers, healthcare professionals, policy makers,  
41  
42 158 community leaders, and teachers.

43  
44  
45 159

46  
47 160 We will include a range of study designs. To determine whether self-consent procedures can  
48  
49 161 increase uptake of vaccination programmes, primary studies reporting parallel group randomised  
50  
51 162 controlled trials, quasi-randomised trials, non-randomised controlled trials, controlled before and  
52  
53 163 after studies, historically controlled studies, and retrospective or prospective cohort studies that  
54  
55 164 include a control group will be eligible. Qualitative studies which use interviews, focus groups,

1  
2  
3 165 observations, or open-ended questions allowing free-text responses in questionnaires will be  
4  
5 166 included to explore views and behaviours related to young people's self-consent for vaccination.  
6

7 167

8  
9 168 Conference abstracts, reviews, editorials, opinion pieces, dissertations, letters and books will only be  
10  
11 169 included if they present original data. There will be no language or country of origin restriction  
12  
13 170 imposed, and any relevant full text paper that is not written in English will be translated.  
14

15 171

16  
17  
18 172 **Study selection**

19  
20 173 Two reviewers will independently assess the titles and abstracts against the predefined eligibility  
21  
22 174 criteria. Full-text publications of all potentially relevant articles will be retrieved and examined for  
23  
24 175 relevance. Any disagreements arising will be resolved by discussion. The reference lists and  
25  
26 176 bibliographies from relevant studies and systematic reviews will be hand-searched for additional  
27  
28 177 primary studies not retrieved by the electronic search.  
29

30 178

31  
32 179 We will use the reference management software EndNote X8 to remove duplicates and sort  
33  
34 180 exclusions and inclusions. The search strategy and study selection process will be documented using  
35  
36 181 a PRISMA flow diagram [12].  
37

38 182

39  
40  
41 183 **Data extraction**

42  
43 184 At least two reviewers will independently extract data from selected studies using structured and  
44  
45 185 standardised data extraction forms used in our previous qualitative and quantitative systematic  
46  
47 186 reviews. In instances where multiple publications relate to the same study, these will be reported  
48  
49 187 together. The following domains will be retrieved: study characteristics (authors, publication year,  
50  
51 188 country, aim, study time period, study design, location, type of setting, data collection period, data  
52  
53 189 collection method, sampling strategy, analysis), participant characteristics (participant age, sample  
54  
55 190 size, vaccination status of participants, socioeconomic indicators, race/ethnicity, gender, and  
56  
57  
58  
59  
60

1  
2  
3 191 religion) and study results (uptake of vaccine, views and behaviours related to self-consent  
4  
5 192 procedures). Where possible, authors will be contacted for missing or incomplete data.  
6  
7 193 Disagreements will be resolved through discussion.  
8

9 194

#### 11 195 **Risk of bias and quality assessment**

12  
13 196 For eligible primary studies, quality assessment will be undertaken to illustrate potential sources of  
14  
15 197 bias. As we anticipate the majority of eligible studies will be observational, studies will not  
16  
17 198 automatically be excluded on the basis of 'low' quality assessment if they are considered to  
18  
19 199 contribute relevant information. We propose using the Cochrane Collaboration's handbook for the  
20  
21 200 assessment of risks of bias for systematic review of randomised controlled studies and quasi-  
22  
23 201 randomised intervention studies [13], the Strengthening the Reporting of Observational Studies in  
24  
25 202 Epidemiology (STROBE) appraisal tool for observational studies [14], and the Critical Appraisal Skills  
26  
27 203 Programme criteria adapted for qualitative studies for evaluating qualitative research [15]. Quality  
28  
29 204 assessment of primary studies will be undertaken independently by two reviewers and then an  
30  
31 205 overall assessment of 'high', 'medium', 'low', or 'unclear' will be assigned and reported.  
32  
33

34 206

#### 36 207 **Data synthesis: Quantitative studies**

37  
38 208 We anticipate that the primary quantitative studies will be reported narratively as preliminary  
39  
40 209 searches specifically related to HPV vaccination programmes indicated a lack of published studies  
41  
42 210 and the likelihood of heterogeneity in relation to study design and reported outcomes. However, if  
43  
44 211 sufficiently similar studies are captured we will consider combining individual study results through  
45  
46 212 meta-analyses. To assess the heterogeneity between studies, we will use the Q-statistic and the  $I^2$ -  
47  
48 213 statistics [16]. Evidence of heterogeneity will be classified as weak, moderate and strong for  
49  
50 214 corresponding  $I^2$  of 25%, 50% and 75% respectively. If heterogeneity between studies is classified as  
51  
52 215 weak, analyses will comprise adjusted odds ratios (aORs) where available, with unadjusted odds  
53  
54 216 ratios used if not reported. Analyses will be undertaken using the meta-analysis function [17]  
55  
56  
57  
58  
59  
60

1  
2  
3 217 available in Stata 15. We do not anticipate sufficient data being available to undertake sub-group  
4  
5 218 analyses.

6  
7 219

8  
9 220 **Data synthesis: Qualitative studies**

10  
11 221 The socio-ecological model [18] considers that behaviour is shaped by a complex interaction  
12  
13 222 between factors operating at public policy, community, organisational, interpersonal, and  
14  
15 223 intrapersonal levels. In a previous qualitative synthesis, we have shown that young women's access  
16  
17 224 to the HPV vaccine is shaped by decisions at different levels of the socio-ecological model [5]. During  
18  
19 225 the analysis, we will use the socio-ecological model to provide a framework for understanding how  
20  
21 226 barriers and facilitators operating at different levels of the model can provide access to, or prevent,  
22  
23 227 young people self-consenting in the context of vaccination programmes.  
24  
25

26 228

27  
28 229 To analyse the qualitative data, the methodology for thematic synthesis reported by Thomas and  
29  
30 230 Harden [19], assisted by the Framework method of qualitative data management [20], will be used.

31  
32 231 These methods are suited to studies with *a priori* aims and objectives. The overall purpose of the  
33  
34 232 synthesis will be to 'pool' the results from individual primary studies by initially separating the  
35  
36 233 findings, coding and interpreting the text, and then combining them through the identification of key  
37  
38 234 themes across the studies as well as similarities and differences within those themes [21]. Thematic  
39  
40 235 synthesis will be led by one reviewer reporting to the wider team about interpretation of the data as  
41  
42 236 analysis progresses.  
43

44  
45 237

46  
47 238 Familiarisation with the dataset will begin with reading the full papers. Pertinent sections of the text  
48  
49 239 reported in each primary study will represent the basic units for analysis. Primary charts of the text  
50  
51 240 will be constructed around key issues using the Framework Matrix within QSR NVivo10 software. For  
52  
53 241 example, initial charts are likely to focus on 'barriers' and 'facilitators' to adolescent self-consent.  
54  
55 242 The primary charts will be retained and revisited as required, but streamlined versions will be  
56  
57  
58  
59  
60

1  
2  
3 243 produced as the process of coding, summarising and synthesising the data progresses. In subsequent  
4  
5 244 charts, key terms and phrases will be retained while repetition within studies and extraneous text  
6  
7 245 are removed. During this process, overarching themes will be identified, and differences or  
8  
9 246 similarities explored within these emerging themes.

10  
11 247

#### 12 13 248 **Data synthesis: Interrogation**

14  
15 249 The final stage of the analysis will aim to firstly comprise testing whether the recommendations  
16  
17 250 developed from the qualitative studies have been addressed in evaluative studies retrieved for the  
18  
19 251 review and, secondly, to examine whether interventions that match the recommendations result in  
20  
21 252 higher uptake in vaccination [9].  
22

23  
24 253

#### 25 26 254 **ETHICS AND DISSEMINATION**

27  
28 255 We will not seek ethical approval for this study because the secondary data to be collected cannot  
29  
30 256 be linked to individuals. As far as we are aware, this will be the first systematic review to collate  
31  
32 257 evidence in relation to adolescent self-consent procedures for vaccination programmes. The review  
33  
34 258 comprises part of a larger study. The findings of this review will inform the larger study evaluating  
35  
36 259 the practicality, acceptability and impact of new self-consent procedures for the schools-based HPV  
37  
38 260 vaccination programme in the UK. Findings will also be used to make recommendations to improve  
39  
40 261 self-consent procedures for young people in vaccination programmes. We anticipate the results of  
41  
42 262 this study this may be of interest to national and international stakeholders interested in improving  
43  
44 263 uptake in adolescent vaccination programmes.  
45

46  
47 264

#### 48 49 265 **FULL REFERENCES**

50  
51 266 1. World Health Organisation, Summary of WHO Position Papers - Recommendations for  
52 267 Routine Immunization, 2017. Available from -  
53 268 [http://www.who.int/immunization/policy/Immunization\\_routine\\_table1.pdf?ua=1](http://www.who.int/immunization/policy/Immunization_routine_table1.pdf?ua=1).  
54 269

- 270 2. Public Health England, Green Book Chapter 11: The UK Immunisation Schedule, 2016.  
271 Available from -  
272 [https://www.gov.uk/government/uploads/system/uploads/attachment\\_data/file/554298/Green\\_Bo](https://www.gov.uk/government/uploads/system/uploads/attachment_data/file/554298/Green_Book_Chapter_11.pdf)  
273 [ok\\_Chapter\\_11.pdf](https://www.gov.uk/government/uploads/system/uploads/attachment_data/file/554298/Green_Book_Chapter_11.pdf).  
274
- 275 3. Convention on the Rights of the Child. United Nations, Treaty Ser, 1989. **1577**.  
276
- 277 4. World Health Organisation, Considerations regarding consent in vaccinating children and  
278 adolescents between 6 and 17 years old, 2014. Available from -  
279 [http://www.who.int/immunization/programmes\\_systems/policies\\_strategies/consent\\_note\\_en.pdf](http://www.who.int/immunization/programmes_systems/policies_strategies/consent_note_en.pdf).  
280
- 281 5. Batista Ferrer, H., et al., Barriers and facilitators to HPV vaccination of young women in high-  
282 income countries: a qualitative systematic review and evidence synthesis. BMC Public Health, 2014.  
283 **14**(1): p. 700.  
284
- 285 6. Batista Ferrer, H., Factors Influencing the Uptake of the Human Papillomavirus (HPV)  
286 Vaccination Programme. PhD Thesis. University of Bristol, November 2014.  
287
- 288 7. Batista Ferrer, H., et al., Barriers and facilitators to uptake of the school-based HPV  
289 vaccination programme in an ethnically diverse group of young women. J Public Health, 2016. **38**(3):  
290 p. 569-577.  
291
- 292 8. Audrey, S., et al., The practicality, acceptability and impact of self-consent procedures for  
293 the Human Papilloma Virus (HPV) vaccine in south-west England: a mixed methods study protocol.  
294 *Under review*.  
295
- 296 9. Harden, A. and J. Thomas, Mixed methods and systematic reviews: examples and emerging  
297 issues. Mixed Methods Handbook, ed. A. Tashakkori and C. Teddlie. 2010, New York: Sage  
298 Publications.  
299
- 300 10. Moher, D., et al., Preferred reporting items for systematic review and meta-analysis  
301 protocols (PRISMA-P) 2015 statement. Systematic Reviews, 2015. **4**(1): p. 1.  
302
- 303 11. Young people's health--a challenge for society. Report of a WHO Study Group on young  
304 people and "Health for All by the Year 2000". World Health Organ Tech Rep Ser, 1986. **731**: p. 1-117.  
305
- 306 12. Moher, D., et al., Preferred reporting items for systematic reviews and meta-analyses: The  
307 PRISMA statement. International Journal of Surgery, 2010. **8**(5): p. 336-341.  
308
- 309 13. Higgins, J., Green, S., Cochrane Handbook for Systematic Reviews of Interventions, 2011.  
310 Available from - <http://handbook.cochrane.org>.  
311
- 312 14. Von Elm, E., et al., The Strengthening the Reporting of Observational Studies in Epidemiology  
313 (STROBE) Statement: guidelines for reporting observational studies. International Journal of Surgery,  
314 2014. **12**(12): p. 1495-1499.  
315
- 316 15. Public Health Resource Unit, Critical Appraisal Skills Programme (CASP): appraisal tools,  
317 1998. Available from - [http://www.york.ac.uk/inst/crd/index\\_guidance.htm](http://www.york.ac.uk/inst/crd/index_guidance.htm).  
318
- 319 16. Higgins, J. and S. Thompson, Quantifying heterogeneity in a meta-analysis. Statistics in  
320 medicine, 2002. **21**(11): p. 1539-1558.

- 1  
2  
3 321  
4 322 17. Sterne, J., M. Bradburn, and M. Egger, Meta-Analysis in Stata™, in Systematic Reviews in  
5 323 Health Care. 2008, BMJ Publishing Group. p. 347-369.  
6 324  
7 325 18. McLeroy, K., et al., An ecological perspective on health promotion programs. Health  
8 326 education quarterly, 1988. **15**(4): p. 351-377.  
9 327  
10 328 19. Thomas, J. and A. Harden, Methods for the thematic synthesis of qualitative research in  
11 329 systematic reviews. BMC Medical Research Methodology, 2008. **8**(1): p. 45.  
12 330  
13 331 20. Ritchie, J. Lewis J., ed. Qualitative research practice: a guide for social science students and  
14 332 researchers. 2003, Sage: London.  
15 333  
16  
17 334 21. Estabrooks, C., P. Field, and J. Morse, Aggregating qualitative findings: an approach to theory  
18 335 development. Qualitative Health Research, 1994. **4**(4): p. 503-511.  
19  
20 336

21  
22 337 **LIST OF ABBREVIATIONS**

23  
24 338 HPV: Human Papillomavirus

25  
26 339 WHO: World Health Organisation

27  
28 340 UK: United Kingdom

29  
30 341 USA: United States of America

31  
32 342 PRISMA: Preferred Reporting Items for Systematic Reviews and Meta-Analyses Protocol

33  
34 343 PROSPERO: Prospective Register of Systematic Reviews

35  
36 344 MeSH: Medical Subject Headings

37  
38 345 STROBE: Strengthening the Reporting of Observational Studies in Epidemiology

39  
40 346 aOR: Adjusted Odds Ratio

41  
42 347 OR: Odds Ratio

43  
44  
45 348

46  
47 349 **AUTHORS' CONTRIBUTIONS**

48  
49 350 All authors were involved in the conception and design of the research. SA is Principal Investigator;

50  
51 351 HB-F is study manager and lead researcher; JM and MH advise on systematic review methodology.

52  
53 352 HB-F wrote the first draft and all authors contributed to the final version of the manuscript.

54  
55  
56 353

1  
2  
3 354 **FUNDING STATEMENT**  
4

5 355 This work is supported by the National Institute for Health Research for Patient Benefit (NIHR RfPB)  
6  
7 356 programme (project number PB-PG-0416-20013). The work is also undertaken with the support of  
8  
9 357 the NIHR Health Protection Research Unit in Evaluation of Interventions. The views and opinions  
10  
11 358 expressed therein are those of the authors and do not necessarily reflect those of the NIHR RfPB  
12  
13 359 Programme, the Department of Health, or Public Health England.  
14

15 360

16  
17 361 **COMPETING INTERESTS STATEMENT**  
18

19 362 The authors declare there are no competing interests.  
20  
21

22 363  
23  
24  
25  
26  
27  
28  
29  
30  
31  
32  
33  
34  
35  
36  
37  
38  
39  
40  
41  
42  
43  
44  
45  
46  
47  
48  
49  
50  
51  
52  
53  
54  
55  
56  
57  
58  
59  
60



364 Table 1. Embase search strategy

1. child/
2. adolescent/
3. ("Young people#" OR "young person#" OR "young offender#" OR adolescent# OR adolescence OR youth# OR minor# OR teen OR teens OR teenage OR teenaged OR teenager# OR juvenile# OR pupil# OR boy# OR girl# OR underage# OR daughter# or son# (school AND dropout#) OR (school AND "drop out#") OR "school aged").mp.
4. active immunization/
5. immunization/
6. immunization programs/
7. mass immunization/
8. revaccination/
9. vaccination/
10. diphtheria vaccine/
11. diphtheria tetanus vaccine/
12. diphtheria pertussis tetanus Haemophilus influenzae type b vaccine/
13. hepatitis B vaccine/
14. meningococcus vaccine/
15. rubella vaccine/
16. wart virus vaccine/
17. Papillomavirus Vaccines/
18. (cervical cancer or diphtheria or diphtheria or diphteria or DtaP or DTP or Hep B or hepatitis or HPV or measles or MenC or MenACWY or meningitis or Meningococcal or Neisseria meningitidis or papillomavirus or pertus\* or rubella or rubeola or td?ipv or tetanus or wart virus or whoop\*).tw.
19. (policy OR program\*)
20. (immuniz\* OR immunis\* OR immunother\* OR inoculat\* OR innoculat\* OR prophyla\* OR revaccinat\* OR vaccin\*).mp.
21. Decision making/
22. Informed consent/
23. Parental consent/
24. Treatment refusal/
25. (assent\* OR competen\* OR decision-making OR decision making OR Gillick OR Fraser OR inform\* consent OR mental capacity OR minor consent OR parent\* consent OR permission\* OR presume\* consent OR treatment refusal OR self consent OR self-consent OR opt-out OR opt-in).mp.
26. 1 or 2 or 3
27. 4 or 5 or 6 or 7 or 8 or 9 or 10 or 11 or 12 or 13 or 14 or 15 or 16 or 17
28. 18 and 20
29. 19 and 20
30. 27 or 28 or 29
31. 21 or 22 or 23 or 24 or 25
32. 26 and 30 or 31

## PRISMA-P 2015 Checklist

This checklist has been adapted for use with systematic review protocol submissions to BioMed Central journals from Table 3 in Moher D et al: Preferred reporting items for systematic review and meta-analysis protocols (PRISMA-P) 2015 statement. *Systematic Reviews* 2015 4:1

An Editorial from the Editors-in-Chief of *Systematic Reviews* details why this checklist was adapted - Moher D, Stewart L & Shekelle P: Implementing PRISMA-P: recommendations for prospective authors. *Systematic Reviews* 2016 5:15

| Section/topic                     | #  | Checklist item                                                                                                                                                                                  | Information reported     |                          | Line number(s) |
|-----------------------------------|----|-------------------------------------------------------------------------------------------------------------------------------------------------------------------------------------------------|--------------------------|--------------------------|----------------|
|                                   |    |                                                                                                                                                                                                 | Yes                      | No                       |                |
| <b>ADMINISTRATIVE INFORMATION</b> |    |                                                                                                                                                                                                 |                          |                          |                |
| <b>Title</b>                      |    |                                                                                                                                                                                                 |                          |                          |                |
| Identification                    | 1a | Identify the report as a protocol of a systematic review                                                                                                                                        | X                        | <input type="checkbox"/> | 1              |
| Update                            | 1b | If the protocol is for an update of a previous systematic review, identify as such                                                                                                              | <input type="checkbox"/> | X                        |                |
| <b>Registration</b>               | 2  | If registered, provide the name of the registry (e.g., PROSPERO) and registration number in the Abstract                                                                                        | X                        | <input type="checkbox"/> | 48, 124-25     |
| <b>Authors</b>                    |    |                                                                                                                                                                                                 |                          |                          |                |
| Contact                           | 3a | Provide name, institutional affiliation, and e-mail address of all protocol authors; provide physical mailing address of corresponding author                                                   | X                        | <input type="checkbox"/> | 3-18           |
| Contributions                     | 3b | Describe contributions of protocol authors and identify the guarantor of the review                                                                                                             | X                        | <input type="checkbox"/> | 345-348        |
| <b>Amendments</b>                 | 4  | If the protocol represents an amendment of a previously completed or published protocol, identify as such and list changes; otherwise, state plan for documenting important protocol amendments | <input type="checkbox"/> | X                        |                |
| <b>Support</b>                    |    |                                                                                                                                                                                                 |                          |                          |                |
| Sources                           | 5a | Indicate sources of financial or other support for the review                                                                                                                                   | X                        | <input type="checkbox"/> | 350-355        |
| Sponsor                           | 5b | Provide name for the review funder and/or sponsor                                                                                                                                               | X                        | <input type="checkbox"/> | 350-355        |
| Role of sponsor/funder            | 5c | Describe roles of funder(s), sponsor(s), and/or institution(s), if any, in developing the protocol                                                                                              | X                        | <input type="checkbox"/> | 350-355        |
| <b>INTRODUCTION</b>               |    |                                                                                                                                                                                                 |                          |                          |                |
| <b>Rationale</b>                  | 6  | Describe the rationale for the review in the context of what is already known                                                                                                                   | X                        | <input type="checkbox"/> | 63-111         |

| Section/topic                             | #   | Checklist item                                                                                                                                                                                                                              | Information reported |                          | Line number(s) |
|-------------------------------------------|-----|---------------------------------------------------------------------------------------------------------------------------------------------------------------------------------------------------------------------------------------------|----------------------|--------------------------|----------------|
|                                           |     |                                                                                                                                                                                                                                             | Yes                  | No                       |                |
| <b>Objectives</b>                         | 7   | Provide an explicit statement of the question(s) the review will address with reference to participants, interventions, comparators, and outcomes (PICO)                                                                                    | X                    | <input type="checkbox"/> | 30-34, 108-111 |
| <b>METHODS</b>                            |     |                                                                                                                                                                                                                                             |                      |                          |                |
| <b>Eligibility criteria</b>               | 8   | Specify the study characteristics (e.g., PICO, study design, setting, time frame) and report characteristics (e.g., years considered, language, publication status) to be used as criteria for eligibility for the review                   | X                    | <input type="checkbox"/> | 140-168        |
| <b>Information sources</b>                | 9   | Describe all intended information sources (e.g., electronic databases, contact with study authors, trial registers, or other grey literature sources) with planned dates of coverage                                                        | X                    | <input type="checkbox"/> | 140-148        |
| <b>Search strategy</b>                    | 10  | Present draft of search strategy to be used for at least one electronic database, including planned limits, such that it could be repeated                                                                                                  | X                    | <input type="checkbox"/> | 360            |
| <b>STUDY RECORDS</b>                      |     |                                                                                                                                                                                                                                             |                      |                          |                |
| Data management                           | 11a | Describe the mechanism(s) that will be used to manage records and data throughout the review                                                                                                                                                | X                    | <input type="checkbox"/> | 148, 177-178   |
| Selection process                         | 11b | State the process that will be used for selecting studies (e.g., two independent reviewers) through each phase of the review (i.e., screening, eligibility, and inclusion in meta-analysis)                                                 | X                    | <input type="checkbox"/> | 170-203        |
| Data collection process                   | 11c | Describe planned method of extracting data from reports (e.g., piloting forms, done independently, in duplicate), any processes for obtaining and confirming data from investigators                                                        | X                    | <input type="checkbox"/> | 181-191        |
| <b>Data items</b>                         | 12  | List and define all variables for which data will be sought (e.g., PICO items, funding sources), any pre-planned data assumptions and simplifications                                                                                       | X                    | <input type="checkbox"/> | 181-191        |
| <b>Outcomes and prioritization</b>        | 13  | List and define all outcomes for which data will be sought, including prioritization of main and additional outcomes, with rationale                                                                                                        | X                    | <input type="checkbox"/> | 189            |
| <b>Risk of bias in individual studies</b> | 14  | Describe anticipated methods for assessing risk of bias of individual studies, including whether this will be done at the outcome or study level, or both; state how this information will be used in data synthesis                        | X                    | <input type="checkbox"/> | 193-203        |
| <b>DATA</b>                               |     |                                                                                                                                                                                                                                             |                      |                          |                |
| <b>Synthesis</b>                          | 15a | Describe criteria under which study data will be quantitatively synthesized                                                                                                                                                                 | X                    | <input type="checkbox"/> | 205-215        |
|                                           | 15b | If data are appropriate for quantitative synthesis, describe planned summary measures, methods of handling data, and methods of combining data from studies, including any planned exploration of consistency (e.g., $I^2$ , Kendall's tau) | X                    | <input type="checkbox"/> | 205-215        |

| Section/topic                            | #   | Checklist item                                                                                                              | Information reported     |                          | Line number(s)   |
|------------------------------------------|-----|-----------------------------------------------------------------------------------------------------------------------------|--------------------------|--------------------------|------------------|
|                                          |     |                                                                                                                             | Yes                      | No                       |                  |
|                                          | 15c | Describe any proposed additional analyses (e.g., sensitivity or subgroup analyses, meta-regression)                         | X                        | <input type="checkbox"/> | 205-215          |
|                                          | 15d | If quantitative synthesis is not appropriate, describe the type of summary planned                                          | X                        | <input type="checkbox"/> | 206-208, 217-249 |
| <b>Meta-bias(es)</b>                     | 16  | Specify any planned assessment of meta-bias(es) (e.g., publication bias across studies, selective reporting within studies) | <input type="checkbox"/> | X                        |                  |
| <b>Confidence in cumulative evidence</b> | 17  | Describe how the strength of the body of evidence will be assessed (e.g., GRADE)                                            | <input type="checkbox"/> | X                        |                  |

# BMJ Open

## Adolescent self-consent for vaccinations: protocol for a mixed methods systematic review

|                                 |                                                                                                                                                                                                                                                                                                                                                                                |
|---------------------------------|--------------------------------------------------------------------------------------------------------------------------------------------------------------------------------------------------------------------------------------------------------------------------------------------------------------------------------------------------------------------------------|
| Journal:                        | <i>BMJ Open</i>                                                                                                                                                                                                                                                                                                                                                                |
| Manuscript ID                   | bmjopen-2017-021335.R1                                                                                                                                                                                                                                                                                                                                                         |
| Article Type:                   | Protocol                                                                                                                                                                                                                                                                                                                                                                       |
| Date Submitted by the Author:   | 26-Mar-2018                                                                                                                                                                                                                                                                                                                                                                    |
| Complete List of Authors:       | Batista, Harriet; University of Bristol, Population Health Sciences: Bristol Medical School<br>Hickman, M; University of Bristol, Population Health Sciences: Bristol Medical School<br>Macleod, John; University of Bristol, Population Health Sciences: Bristol Medical School<br>Audrey, Suzanne; University of Bristol, Population Health Sciences: Bristol Medical School |
| <b>Primary Subject Heading</b>: | Infectious diseases                                                                                                                                                                                                                                                                                                                                                            |
| Secondary Subject Heading:      | Public health, Qualitative research                                                                                                                                                                                                                                                                                                                                            |
| Keywords:                       | Self-consent, Vaccination, Systematic review, Mixed methods, Adolescents                                                                                                                                                                                                                                                                                                       |
|                                 |                                                                                                                                                                                                                                                                                                                                                                                |

SCHOLARONE™  
Manuscripts

View Only

1  
2  
3 1 **TITLE: Adolescent self-consent for vaccinations: protocol for a mixed methods systematic review**

4  
5 2

6  
7 3 Dr Harriet Batista Ferrer, Population Health Sciences, Bristol Medical School, University of Bristol.

8  
9 4 Professor Matthew Hickman, Population Health Sciences, Bristol Medical School, University of

10  
11 5 Bristol.

12  
13 6 Professor John Macleod, Population Health Sciences, Bristol Medical School, University of Bristol.

14  
15 7 Dr Suzanne Audrey, Population Health Sciences, Bristol Medical School, University of Bristol.

16  
17 8

18  
19 9 **Corresponding author:**

20  
21 10 Dr Harriet Batista Ferrer

22  
23 11 Senior Research Associate

24  
25 12 Population Health Sciences, Bristol Medical School

26  
27 13 University of Bristol

28  
29 14 Canynge Hall

30  
31 15 Whatley Road

32  
33 16 Bristol BS8 2PS

34  
35 17 Email: Harriet.Batista@bristol.ac.uk

36  
37 18 Telephone: +44 (0) 117 928 7223

38  
39 19

40  
41 20 **Word count: 2,219**

42  
43 21

44  
45 22 **Key words**

46  
47 23 Self-consent, Vaccination, Systematic review, Adolescents, Mixed Methods

48  
49 24

1  
2  
3 25 **ABSTRACT**  
4

5 26 **Introduction:** The recent global expansion of routine adolescent vaccination programmes has the  
6  
7 27 potential to protect young people against the acquisition of infectious disease and improve their  
8  
9 28 health. Although in many countries the legal framework supports young people to provide consent  
10  
11 29 for medical interventions if they are considered competent, written parental consent can act as a  
12  
13 30 barrier to uptake as it is frequently a condition of adolescent vaccination programmes. The aim of  
14  
15 31 this systematic review protocol is to document the methods which will be used to identify, appraise  
16  
17 32 and synthesise the available qualitative and quantitative evidence to address: (i) whether  
18  
19 33 implementation of adolescent self-consent procedures can increase vaccination uptake, and; (ii) the  
20  
21 34 barriers and facilitators to implementation of adolescent self-consent procedures.  
22

23  
24 35 **Methods and analysis:** Comprehensive search strategy of all relevant electronic databases for both  
25  
26 36 qualitative and quantitative studies using predefined inclusion and exclusion criteria. At least two  
27  
28 37 authors will independently review titles and abstracts, extract data and assess the methodological  
29  
30 38 quality of eligible primary studies, resolving disagreements by consensus. Quantitative studies will  
31  
32 39 be reported narratively and where possible pooled in a meta-analysis using a random-effects model.  
33  
34 40 The findings of qualitative primary studies will be extracted, interpreted and synthesised to identify  
35  
36 41 overarching themes as well as similarities and differences within those themes.  
37

38  
39 42 **Ethics and dissemination:** As this systematic review involves analysis of secondary data, the study  
40  
41 43 does not require ethical approvals. We will use our findings to assess whether the evidence supports  
42  
43 44 the hypothesis that self-consent procedures can increase coverage of adolescent vaccination  
44  
45 45 programmes. We will identify barriers and facilitators to the implementation of adolescent self-  
46  
47 46 consent for vaccination, and make recommendations for policy-makers and practitioners in relation  
48  
49 47 to consent procedures within vaccination programmes for young people.  
50

51 48 **Systematic review registration:** PROSPERO CRD42017084509  
52

53 49 **Word count:** 284  
54  
55  
56  
57  
58  
59  
60

1  
2  
3 51 **Strengths and limitations of this study**  
4

5 52 • The mixed methods systematic review will answer complementary research questions about  
6  
7 53 self-consent for adolescent vaccination programmes  
8

9 54 • Robust systematic review methodology will be used to identify, appraise and synthesise the  
10  
11 55 relevant qualitative and quantitative literature  
12

13 56 • Lack of primary studies and heterogeneity of eligible studies in terms of study design, population  
14  
15 57 and reporting may limit our ability to infer conclusions in relation to the research questions  
16  
17

18 58  
19  
20  
21  
22  
23  
24  
25  
26  
27  
28  
29  
30  
31  
32  
33  
34  
35  
36  
37  
38  
39  
40  
41  
42  
43  
44  
45  
46  
47  
48  
49  
50  
51  
52  
53  
54  
55  
56  
57  
58  
59  
60



## 59 INTRODUCTION

60 In recent years, the number of routine vaccinations recommended during adolescence have  
61 increased, and include vaccines that protect against tetanus, diphtheria, meningitis and human  
62 papillomavirus (HPV) acquisition [1, 2]. Provided sufficient coverage is achieved, the expansion of  
63 adolescent vaccination programmes may improve young people's health by protecting them from  
64 potentially life- threatening infectious diseases.

65  
66 The introduction of new adolescent vaccination programmes is relevant to the debate about young  
67 people's capacity to provide consent to receive medical treatment. The United Nations Convention  
68 on the Rights of the Child recognises the right for all children and young people to participate in  
69 decision-making processes which involve them [3]. However, the World Health Organisation (WHO)  
70 has acknowledged difficulties over consent for vaccination of adolescents because of their age, and  
71 describes current practice through which countries are encouraged to adopt procedures that ensure  
72 parents have been informed and agreed to the vaccination [4].

73  
74 In most countries, the legal framework for consent requires parental or guardian permission for  
75 young people aged below 18 years [4]. However, the age of consent for medical interventions, such  
76 as vaccination programmes, is lower in some countries. In the United Kingdom (UK), Canada and  
77 Sweden young women are legally able to override parental decisions if they are considered mature  
78 enough to make, and understand the consequences of, the decision to vaccinate. In Australia and  
79 the United States of America (USA) there are geographic variations of the age (12 to 17 years) that a  
80 young person can consent to be vaccinated. Despite young people being supported by the law to  
81 provide consent themselves, written parental consent is usually sought. In relation to the HPV  
82 vaccination programme, this has been shown to act as an important barrier preventing young  
83 women (usually aged 12 to 13 years) receiving the Human Papillomavirus (HPV) vaccine, with

1  
2  
3 84 implications for vaccination programme coverage [5, 6]. Furthermore, it is a barrier with potential to  
4  
5 85 reinforce health inequalities since lack of written parental consent may also be related to lower  
6  
7 86 socioeconomic status and some ethnic groups [5, 7].  
8  
9

10 87 To examine the issue of self-consent for the HPV vaccine in more detail, a mixed-methods study has  
11  
12 88 been funded by the National Institute for Health Research (NIHR) Research for Patient Benefit  
13  
14 89 Programme (RfPB) in England. The study is examining the practicality, acceptability and impact of  
15  
16 90 implementing new self-consent procedures for the schools-based HPV vaccination in two local  
17  
18 91 authorities in the south-west of England [8]. There are three elements to the study: statistical  
19  
20 92 analyses of routine data to assess the impact of self-consent on overall uptake levels and in relation  
21  
22 93 to socio-economic status, ethnicity and type of school; a process evaluation to examine the context,  
23  
24 94 implementation and response to the new consent procedures, and; a systematic review of the  
25  
26 95 evidence relating to self-consent for adolescent vaccines. The current protocol focusses on the  
27  
28 96 systematic review which will run alongside, and inform, the other elements of the study.  
29  
30

31 97

32  
33 98 An initial scoping search suggested a paucity of peer-reviewed evidence in relation to self-consent  
34  
35 99 procedures for HPV vaccination programmes. Since issues relating to self-consent for the HPV  
36  
37 100 vaccination are likely to be relevant for other vaccinations delivered during adolescence we widened  
38  
39 101 the scope of the systematic review to identify and collate the evidence across all adolescent  
40  
41 102 vaccination programmes. We chose to restrict to vaccination programmes, rather than include  
42  
43 103 studies related to healthcare in general, to ensure the findings were relevant to the programme of  
44  
45 104 research described above. Therefore, the aim of this mixed-methods systematic review is to identify,  
46  
47 105 appraise and synthesise the available qualitative and quantitative literature to gain understanding as  
48  
49 106 to: (i) whether implementation of adolescent self-consent procedures can increase vaccination  
50  
51 107 uptake, and; (ii) the related barriers and facilitators to implementation of adolescent self-consent  
52  
53 108 procedures.  
54  
55  
56  
57  
58  
59  
60

1  
2  
3 1094  
5 110 **METHODS AND ANALYSIS**

6  
7 111 We are using mixed methods methodology within this systematic review to answer complementary  
8  
9 112 research questions within one study. In addition to answering questions of the effectiveness of self-  
10  
11 113 consent interventions at increasing uptake of adolescent vaccination programmes, the systematic  
12  
13 114 review will also synthesise qualitative research comprising the views of young people and relevant  
14  
15 115 stakeholders to gain understanding of how self-consent procedures can be implemented effectively  
16  
17 116 to increase uptake [9]. The findings from the qualitative and quantitative studies will be integrated  
18  
19 117 to produce recommendations for future policy and practice [9].  
20

21  
22 118

23  
24 119 This review protocol was prepared using the Preferred Reporting Items for Systematic Reviews and  
25  
26 120 Meta-Analyses (PRISMA) Protocol guidelines [10] (Supplementary file 1) and has been registered  
27  
28 121 with the International Prospective Register of Systematic Reviews (PROSPERO) (Registration  
29  
30 122 number: CRD42017084509).  
31

32 123

33  
34 124 **Search strategy**

35  
36 125 A comprehensive search strategy has been developed to capture all literature relevant to adolescent  
37  
38 126 self-consent procedures for vaccination programmes by a reviewer (HB-F) experienced in  
39  
40 127 undertaking systematic reviews in the proposed research field and discussed with members of the  
41  
42 128 research team. The original search strategy developed for the Embase database has been adapted  
43  
44 129 for each included database (see below) and comprises a combination of text words and the  
45  
46 130 following medical subject headings (MeSH) indexing terms: 'child', 'adolescent', 'active  
47  
48 131 immunization', 'immunization', 'immunization programs', 'mass immunization', 'revaccination',  
49  
50 132 'vaccination', 'diphtheria vaccine', 'diphtheria tetanus vaccine', 'diphtheria pertussis tetanus',  
51  
52 133 'haemophilus influenzae type b vaccine', 'hepatitis b vaccine', 'meningococcus vaccine', 'rubella  
53  
54 134 vaccine', 'wart virus vaccine', 'papillomavirus vaccines', 'decision making', 'informed consent',  
55  
56  
57  
58  
59  
60

1  
2  
3 135 'parental consent', 'treatment refusal' (Table 1). Study design filters or restrictions by setting will not  
4  
5 136 be applied as the study aims to be inclusive in relation to study design and settings eligible for  
6  
7 137 inclusion.  
8

9 138

#### 10 11 139 **Databases**

12  
13 140 To ensure all the relevant literature is captured, we will search the following ten databases from  
14  
15 141 inception to January 2018 and re-run six months later (June 2018) to inform the wider research  
16  
17 142 study as it progresses: Child Development & Adolescent Studies via EBSCOhost, Cochrane Central  
18  
19 143 Register of Controlled Trials via The Cochrane Library, Cochrane Reviews via The Cochrane Library,  
20  
21 144 Cumulative Index to Nursing and Allied Health Literature via EBSCOhost, Embase via Ovid, Health  
22  
23 145 Technology Assessment Database, Medline via Ovid, PsycINFO via Ovid, Social Care Online via Social  
24  
25 146 Care Institute for Excellence and Web of Science Core Collection: Social Sciences Citation Index and  
26  
27 147 Conference Proceedings Citation Index- Science. All abstracts will be saved using Endnote X8.  
28

29  
30 148

#### 31 32 149 **Inclusion and exclusion criteria**

33  
34 150 Quantitative studies will be eligible if vaccine uptake following implementation of self-consent  
35  
36 151 procedures is reported for young people aged between ten and 18 years [11]. Qualitative studies  
37  
38 152 reporting the views and experiences of key stakeholders in relation adolescent self-consent  
39  
40 153 procedures will also be included. Studies related to consent procedures solely targeting parents of  
41  
42 154 adolescents, or early childhood and adult vaccination programmes will not be eligible for inclusion.  
43  
44 155 Relevant stakeholders will vary with context but are likely to include young people, parents or  
45  
46 156 primary care givers, healthcare professionals, policy makers, community leaders and teachers.  
47

48  
49 157

50  
51 158 We will include a range of study designs. To determine whether self-consent procedures can  
52  
53 159 increase uptake of vaccination programmes, primary studies reporting parallel group randomised  
54  
55 160 controlled trials, quasi-randomised trials, non-randomised controlled trials, controlled before and  
56  
57

1  
2  
3 161 after studies, historically controlled studies, and retrospective or prospective cohort studies that  
4  
5 162 include a control group will be eligible. Qualitative studies which use interviews, focus groups,  
6  
7 163 observations, or open-ended questions allowing free-text responses in questionnaires will be  
8  
9 164 included to explore views and behaviours related to young people's self-consent for vaccination.

10  
11 165

12  
13 166 Conference abstracts, reviews, editorials, opinion pieces, dissertations, letters and books will only be  
14  
15 167 included if they present original data. There will be no language or country of origin restriction  
16  
17 168 imposed, and any relevant full text paper that is not written in English will be translated.

18  
19 169

## 20 21 22 170 **Study selection**

23  
24 171 Two reviewers will independently assess the titles and abstracts against the predefined eligibility  
25  
26 172 criteria. Full-text publications of all potentially relevant articles will be retrieved and examined for  
27  
28 173 relevance. Any disagreements arising will be resolved by discussion. The reference lists and  
29  
30 174 bibliographies from relevant studies and systematic reviews will be hand-searched for additional  
31  
32 175 primary studies not retrieved by the electronic search.

33  
34 176

35  
36 177 We will use the reference management software EndNote X8 to remove duplicates and sort  
37  
38 178 exclusions and inclusions. The search strategy and study selection process will be documented using  
39  
40 179 a PRISMA flow diagram [12].

41  
42 180

## 43 44 45 181 **Data extraction**

46  
47 182 At least two reviewers will independently extract data from selected studies using structured and  
48  
49 183 standardised data extraction forms used in our previous qualitative and quantitative systematic  
50  
51 184 reviews. In instances where multiple publications relate to the same study, these will be reported  
52  
53 185 together. The following domains will be retrieved: study characteristics (authors, publication year,  
54  
55 186 country, aim, study time period, study design, location, type of setting, data collection period, data

1  
2  
3 187 collection method, sampling strategy, analysis, participant characteristics (participant age, sample  
4  
5 188 size, vaccination status of participants, socioeconomic indicators, race/ethnicity, gender, and  
6  
7 189 religion) and study results (uptake of vaccine, psychological outcomes, healthcare service use,  
8  
9 190 incidence of vaccine preventable disease, views and behaviours related to self-consent procedures,  
10  
11 191 authors' reported conflicts of interest and study funding sources). We will also record data relating  
12  
13 192 to the possible harms resulting from self-consent procedures (e.g. conflict with parents, healthcare  
14  
15 193 professional anxiety). Where possible, authors will be contacted for missing or incomplete data.  
16  
17 194 Disagreements will be resolved through discussion.  
18  
19  
20  
21

195

### 196 **Risk of bias and quality assessment**

197 For eligible primary studies, quality assessment will be undertaken to illustrate potential sources of  
198 bias. As we anticipate the majority of eligible studies will be observational, studies will not  
199 automatically be excluded on the basis of 'low' quality assessment if they are considered to  
200 contribute relevant information. We propose using: the Cochrane Collaboration's handbook for the  
201 assessment of risks of bias for systematic review of randomised controlled studies and quasi-  
202 randomised intervention studies [13] Risk Of Bias in Non Randomised Studies of Interventions  
203 (ROBINS-I) [14] ;, the NIH Quality Assessment Tool for Observational Cohort and Cross-Sectional  
204 Studies [15], and; the Critical Appraisal Skills Programme criteria adapted for qualitative studies for  
205 evaluating qualitative research [16]. Quality assessment of primary studies will be undertaken  
206 independently by two reviewers and recorded in an excel spreadsheet. An overall assessment of  
207 'high', 'medium', 'low', or 'unclear' will be assigned and reported.  
208

209

### 209 **Data synthesis: Quantitative studies**

210 We anticipate that the primary quantitative studies will be reported narratively as preliminary  
211 searches specifically related to HPV vaccination programmes indicated a lack of published studies  
212 and the likelihood of heterogeneity in relation to study design and reported outcomes. However, if

1  
2  
3 213 sufficiently similar studies are captured we will consider combining individual study results through  
4  
5 214 meta-analyses. To assess the heterogeneity between studies, we will use the Q-statistic and the  $I^2$ -  
6  
7 215 statistics [17]. Evidence of heterogeneity will be classified as weak, moderate and strong for  
8  
9 216 corresponding  $I^2$  of 25%, 50% and 75% respectively. If heterogeneity between studies is classified as  
10  
11 217 weak, analyses will comprise adjusted odds ratios (aORs) where available, with unadjusted odds  
12  
13 218 ratios used if not reported. Analyses will be undertaken using the meta-analysis function [18]  
14  
15 219 available in Stata 15. We do not anticipate sufficient data being available to undertake sub-group  
16  
17 220 analyses. However, if sufficient data were reported we propose two sub-group analyses to compare  
18  
19 221 impact of self-consent procedures by: (i) setting (healthcare vs. school) and (ii) age of participants  
20  
21 222 (less than 14 years old vs. 14 years and greater).  
22  
23

24 223

#### 25 224 **Data synthesis: Qualitative studies**

26  
27  
28 225 The socio-ecological model [19] considers that behaviour is shaped by a complex interaction  
29  
30 226 between factors operating at public policy, community, organisational, interpersonal and  
31  
32 227 intrapersonal levels. In a previous qualitative synthesis, we have shown that young women's access  
33  
34 228 to the HPV vaccine is shaped by decisions at different levels of the socio-ecological model [5]. During  
35  
36 229 the analysis, we will use the socio-ecological model to provide a framework for understanding how  
37  
38 230 barriers and facilitators operating at different levels of the model can provide access to, or prevent,  
39  
40 231 young people self-consenting in the context of vaccination programmes.  
41  
42

43 232

44  
45 233 To analyse the qualitative data, the methodology for thematic synthesis reported by Thomas and  
46  
47 234 Harden [20], assisted by the Framework method of qualitative data management [21], will be used.

48  
49 235 These methods are suited to studies with *a priori* aims and objectives. The overall purpose of the  
50  
51 236 synthesis will be to 'pool' the results from individual primary studies by initially separating the  
52  
53 237 findings, coding and interpreting the text, and then combining them through the identification of key  
54  
55 238 themes across the studies as well as similarities and differences within those themes [22]. Thematic  
56  
57  
58  
59

239 synthesis will be led by one reviewer reporting to the wider team about interpretation of the data as  
240 analysis progresses.

241

242 Familiarisation with the dataset will begin with reading the full papers. Pertinent sections of the text  
243 reported in each primary study will represent the basic units for analysis. Primary charts of the text  
244 will be constructed around key issues using the Framework Matrix within QSR NVivo10 software. For  
245 example, initial charts are likely to focus on 'barriers' and 'facilitators' to adolescent self-consent.  
246 The primary charts will be retained and revisited as required. Streamlined versions will be produced  
247 as the process of coding, summarising and synthesising the data progresses. In subsequent charts,  
248 key terms and phrases will be retained while repetition within studies and extraneous text are  
249 removed. During this process, overarching themes will be identified, and differences or similarities  
250 explored within these emerging themes.

251

#### 252 **Data synthesis: Interrogation**

253 The final stage of the analysis will aim, firstly, to test whether the recommendations developed from  
254 the qualitative studies have been addressed in evaluative studies retrieved for the review and,  
255 secondly, to examine whether interventions that match the recommendations result in higher  
256 uptake in vaccination [9].

257

#### 258 **Patient and public involvement**

259 The Bristol Young People's Advisory Group (YPAG) comprises young people aged ten to 17 years who  
260 are interested in healthcare and research. They meet regularly to help researchers with their  
261 projects and have been consulted about the design of the wider study and participant materials.  
262 They will also be invited to an event at the end of the study to consider findings and  
263 recommendations with the young people, parents, immunisation nurses and school staff involved in  
264 the study.



265

**266 ETHICS AND DISSEMINATION**

267 We will not seek ethical approval for this study because the secondary data to be collected cannot  
268 be linked to individuals. As far as we are aware, this will be the first systematic review to collate  
269 evidence in relation to adolescent self-consent procedures for vaccination programmes. The review  
270 comprises part of a larger study. The findings of this review will inform the larger study evaluating  
271 the practicality, acceptability and impact of new self-consent procedures for the schools-based HPV  
272 vaccination programme in the UK. Findings will also be used to make recommendations to improve  
273 self-consent procedures for young people in vaccination programmes. We anticipate the results of  
274 this study this may be of interest to national and international stakeholders interested in improving  
275 uptake in adolescent vaccination programmes.

276

**277 FULL REFERENCES**

- 278 1. World Health Organisation, Summary of WHO Position Papers - Recommendations for  
279 Routine Immunization, 2017. Available from -  
280 [http://www.who.int/immunization/policy/Immunization\\_routine\\_table1.pdf?ua=1](http://www.who.int/immunization/policy/Immunization_routine_table1.pdf?ua=1).  
281
- 282 2. Public Health England, Green Book Chapter 11: The UK Immunisation Schedule, 2016.  
283 Available from -  
284 [https://www.gov.uk/government/uploads/system/uploads/attachment\\_data/file/554298/Green\\_Book\\_Chapter\\_11.pdf](https://www.gov.uk/government/uploads/system/uploads/attachment_data/file/554298/Green_Book_Chapter_11.pdf).  
285  
286
- 287 3. Convention on the Rights of the Child. United Nations, Treaty Ser, 1989. **1577**.  
288
- 289 4. World Health Organisation, Considerations regarding consent in vaccinating children and  
290 adolescents between 6 and 17 years old, 2014. Available from -  
291 [http://www.who.int/immunization/programmes\\_systems/policies\\_strategies/consent\\_note\\_en.pdf](http://www.who.int/immunization/programmes_systems/policies_strategies/consent_note_en.pdf).  
292  
293
- 294 5. Batista Ferrer, H., et al., Barriers and facilitators to HPV vaccination of young women in high-  
295 income countries: a qualitative systematic review and evidence synthesis. BMC Public  
296 Health, 2014. **14**(1): p. 700.  
297
- 298 6. Batista Ferrer, H., Factors Influencing the Uptake of the Human Papillomavirus (HPV)  
299 Vaccination Programme. PhD Thesis. University of Bristol, November 2014.  
300

- 1  
2  
3 301 7. Batista Ferrer, H., et al., Barriers and facilitators to uptake of the school-based HPV  
4 302 vaccination programme in an ethnically diverse group of young women. *J Public Health (Oxf)*,  
5 303 2016. **38**(3): p. 569-577.  
6 304
- 7 305 8. Audrey, S., et al., Impact and acceptability of self-consent procedures for the school-based  
8 306 human papillomavirus vaccine: a mixed-methods study protocol. *BMJ Open*, 2018. **8**(3).  
9 307
- 10 308 9. Harden, A. and J. Thomas, Mixed methods and systematic reviews: examples and emerging  
11 309 issues. *Mixed Methods Handbook*, ed. A. Tashakkori and C. Teddlie. 2010, New York: Sage  
12 310 Publications.  
13 311
- 14 312 10. Moher, D., et al., Preferred reporting items for systematic review and meta-analysis  
15 313 protocols (PRISMA-P) 2015 statement. *Systematic Reviews*, 2015. **4**(1): p. 1.  
16 314
- 17 315 11. Young people's health—a challenge for society. Report of a WHO Study Group on young  
18 316 people and "Health for All by the Year 2000". *World Health Organ Tech Rep Ser*, 1986. **731**:  
19 317 p. 1-117.  
20 318
- 21 319 12. Moher, D., et al., Preferred reporting items for systematic reviews and meta-analyses: The  
22 320 PRISMA statement. *International Journal of Surgery*, 2010. **8**(5): p. 336-341.  
23 321
- 24 322 13. Higgins J, Green, S., *Cochrane Handbook for Systematic Reviews of Interventions*, 2011.  
25 323 Available from - <http://handbook.cochrane.org>.  
26 324
- 27 325 14. Sterne, J.A., et al., ROBINS-I: a tool for assessing risk of bias in non-randomised studies of  
28 326 interventions. *BMJ*, 2016. **355**.  
29 327
- 30 328 15. National Institute for Health Quality Assessment Tool for Observational Cohort and Cross-  
31 329 Sectional Studies, 2017. Available from - [https://www.nhlbi.nih.gov/health-topics/study-](https://www.nhlbi.nih.gov/health-topics/study-quality-assessment-tools)  
32 330 [quality-assessment-tools](https://www.nhlbi.nih.gov/health-topics/study-quality-assessment-tools).  
33 331
- 34 332 16. Public Health Resource Unit, *Critical Appraisal Skills Programme (CASP): appraisal tools*,  
35 333 1998. Available from - [http://www.york.ac.uk/inst/crd/index\\_guidance.htm](http://www.york.ac.uk/inst/crd/index_guidance.htm).  
36 334
- 37 335 17. Higgins, J. and S.G. Thompson, Quantifying heterogeneity in a meta-analysis. *Statistics in*  
38 336 *medicine*, 2002. **21**(11): p. 1539-1558.  
39 337
- 40 338 18. Sterne, J., M.J. Bradburn, and M. Egger, *Meta-Analysis in Stata™*, in *Systematic Reviews in*  
41 339 *Health Care*. 2008, BMJ Publishing Group. p. 347-369.  
42 340
- 43 341 19. McLeroy, K.R., et al., An ecological perspective on health promotion programs. *Health*  
44 342 *education quarterly*, 1988. **15**(4): p. 351-377.  
45 343
- 46 344 20. Thomas, J. and A. Harden, Methods for the thematic synthesis of qualitative research in  
47 345 systematic reviews. *BMC Medical Research Methodology*, 2008. **8**(1): p. 45.  
48 346
- 49 347 21. Ritchie J, Lewis .J., ed. *Qualitative research practice: a guide for social science students and*  
50 348 *researchers*. 2003, Sage: London.  
51 349
- 52 350 22. Estabrooks, C.A., P.A. Field, and J.M. Morse, Aggregating qualitative findings: an approach to  
53 351 theory development. *Qualitative Health Research*, 1994. **4**(4): p. 503-511.

- 1  
2  
3 352  
4 353 **LIST OF ABBREVIATIONS**  
5  
6 354 HPV: Human Papillomavirus  
7  
8 355 WHO: World Health Organisation  
9  
10 356 UK: United Kingdom  
11  
12 357 USA: United States of America  
13  
14 358 PRISMA: Preferred Reporting Items for Systematic Reviews and Meta-Analyses Protocol  
15  
16 359 PROSPERO: Prospective Register of Systematic Reviews  
17  
18 360 MeSH: Medical Subject Headings  
19  
20 361 STROBE: Strengthening the Reporting of Observational Studies in Epidemiology  
21  
22 362 aOR: Adjusted Odds Ratio  
23  
24 363 OR: Odds Ratio  
25  
26 364 YPAG: Young Person's Advisory Group  
27  
28  
29  
30

31 366 **AUTHORS' CONTRIBUTIONS**

32  
33 367 All authors were involved in the conception and design of the research. SA is Principal Investigator;  
34  
35 368 HB-F is study manager and lead researcher; JM and MH advise on systematic review methodology.  
36  
37 369 HB-F wrote the first draft and all authors contributed to the final version of the manuscript.  
38  
39  
40

41 371 **FUNDING STATEMENT**

42  
43 372 This work is supported by the National Institute for Health Research for Patient Benefit (NIHR RfPB)  
44  
45 373 programme (project number PB-PG-0416-20013). The work is also undertaken with the support of  
46  
47 374 the NIHR Health Protection Research Unit in Evaluation of Interventions. The work was also  
48  
49 375 undertaken with the support of The Centre for the Development and Evaluation of Complex  
50  
51 376 Interventions for Public Health Improvement (DECIPHer), a UKCRC Public Health Research Centre of  
52  
53 377 Excellence. Joint funding (MR/KO232331/1) from the British Heart Foundation, Cancer Research UK,  
54  
55  
56  
57  
58  
59  
60

1  
2  
3 378 Economic and Social Research Council, Medical Research Council, the Welsh Government and the  
4  
5 379 Wellcome Trust, under the auspices of the UK Clinical Research Collaboration, is gratefully  
6  
7 380 acknowledged. The views and opinions expressed therein are those of the authors and do not  
8  
9 381 necessarily reflect those of the NIHR RfPB Programme, the Department of Health, or Public Health  
10  
11 382 England.

12  
13 383

14  
15 384 **COMPETING INTERESTS STATEMENT**

16  
17 385 The authors declare there are no competing interests.

18  
19 386  
20  
21  
22  
23  
24  
25  
26  
27  
28  
29  
30  
31  
32  
33  
34  
35  
36  
37  
38  
39  
40  
41  
42  
43  
44  
45  
46  
47  
48  
49  
50  
51  
52  
53  
54  
55  
56  
57  
58  
59  
60

387 Table 1. Embase search strategy

1. child/
2. adolescent/
3. ("Young people#" OR "young person#" OR "young offender#" OR adolescent# OR adolescence OR youth# OR minor# OR teen OR teens OR teenage OR teenaged OR teenager# OR juvenile# OR pupil# OR boy# OR girl# OR underage# OR daughter# or son# (school AND dropout#) OR (school AND "drop out#") OR "school aged").mp.
4. active immunization/
5. immunization/
6. immunization programs/
7. mass immunization/
8. revaccination/
9. vaccination/
10. diphtheria vaccine/
11. diphtheria tetanus vaccine/
12. diphtheria pertussis tetanus Haemophilus influenzae type b vaccine/
13. hepatitis B vaccine/
14. meningococcus vaccine/
15. rubella vaccine/
16. wart virus vaccine/
17. Papillomavirus Vaccines/
18. (cervical cancer or diphtheria or diphtheria or diphteria or DtaP or DTP or Hep B or hepatitis or HPV or measles or MenC or MenACWY or meningitis or Meningococcal or Neisseria meningitidis or papillomavirus or pertus\* or rubella or rubeola or td?ipv or tetanus or wart virus or whoop\*).tw.
19. (policy OR program\*)
20. (immuniz\* OR immunis\* OR immunother\* OR inoculat\* OR innoculat\* OR prophyla\* OR revaccinat\* OR vaccin\*).mp.
21. Decision making/
22. Informed consent/
23. Parental consent/
24. Treatment refusal/
25. (assent\* OR competen\* OR decision-making OR decision making OR Gillick OR Fraser OR inform\* consent OR mental capacity OR minor consent OR parent\* consent OR permission\* OR presume\* consent OR treatment refusal OR self consent OR self-consent OR opt-out OR opt-in).mp.
26. 1 or 2 or 3
27. 4 or 5 or 6 or 7 or 8 or 9 or 10 or 11 or 12 or 13 or 14 or 15 or 16 or 17
28. 18 and 20
29. 19 and 20
30. 27 or 28 or 29
31. 21 or 22 or 23 or 24 or 25
32. 26 and 30 or 31

## PRISMA-P 2015 Checklist

This checklist has been adapted for use with systematic review protocol submissions to BioMed Central journals from Table 3 in Moher D et al: Preferred reporting items for systematic review and meta-analysis protocols (PRISMA-P) 2015 statement. *Systematic Reviews* 2015 4:1

An Editorial from the Editors-in-Chief of *Systematic Reviews* details why this checklist was adapted - Moher D, Stewart L & Shekelle P: Implementing PRISMA-P: recommendations for prospective authors. *Systematic Reviews* 2016 5:15

| Section/topic                     | #  | Checklist item                                                                                                                                                                                  | Information reported     |                          | Line number(s) |
|-----------------------------------|----|-------------------------------------------------------------------------------------------------------------------------------------------------------------------------------------------------|--------------------------|--------------------------|----------------|
|                                   |    |                                                                                                                                                                                                 | Yes                      | No                       |                |
| <b>ADMINISTRATIVE INFORMATION</b> |    |                                                                                                                                                                                                 |                          |                          |                |
| <b>Title</b>                      |    |                                                                                                                                                                                                 |                          |                          |                |
| Identification                    | 1a | Identify the report as a protocol of a systematic review                                                                                                                                        | X                        | <input type="checkbox"/> | 1              |
| Update                            | 1b | If the protocol is for an update of a previous systematic review, identify as such                                                                                                              | <input type="checkbox"/> | X                        |                |
| <b>Registration</b>               | 2  | If registered, provide the name of the registry (e.g., PROSPERO) and registration number in the Abstract                                                                                        | X                        | <input type="checkbox"/> | 48, 120-21     |
| <b>Authors</b>                    |    |                                                                                                                                                                                                 |                          |                          |                |
| Contact                           | 3a | Provide name, institutional affiliation, and e-mail address of all protocol authors; provide physical mailing address of corresponding author                                                   | X                        | <input type="checkbox"/> | 3-18           |
| Contributions                     | 3b | Describe contributions of protocol authors and identify the guarantor of the review                                                                                                             | X                        | <input type="checkbox"/> | 362-365        |
| <b>Amendments</b>                 | 4  | If the protocol represents an amendment of a previously completed or published protocol, identify as such and list changes; otherwise, state plan for documenting important protocol amendments | <input type="checkbox"/> | X                        |                |
| <b>Support</b>                    |    |                                                                                                                                                                                                 |                          |                          |                |
| Sources                           | 5a | Indicate sources of financial or other support for the review                                                                                                                                   | X                        | <input type="checkbox"/> | 367-377        |
| Sponsor                           | 5b | Provide name for the review funder and/or sponsor                                                                                                                                               | X                        | <input type="checkbox"/> | 367-377        |
| Role of sponsor/funder            | 5c | Describe roles of funder(s), sponsor(s), and/or institution(s), if any, in developing the protocol                                                                                              | X                        | <input type="checkbox"/> | 367-377        |
| <b>INTRODUCTION</b>               |    |                                                                                                                                                                                                 |                          |                          |                |
| <b>Rationale</b>                  | 6  | Describe the rationale for the review in the context of what is already known                                                                                                                   | X                        | <input type="checkbox"/> | 59-107         |

| Section/topic                             | #   | Checklist item                                                                                                                                                                                                                              | Information reported |                          | Line number(s) |
|-------------------------------------------|-----|---------------------------------------------------------------------------------------------------------------------------------------------------------------------------------------------------------------------------------------------|----------------------|--------------------------|----------------|
|                                           |     |                                                                                                                                                                                                                                             | Yes                  | No                       |                |
| <b>Objectives</b>                         | 7   | Provide an explicit statement of the question(s) the review will address with reference to participants, interventions, comparators, and outcomes (PICO)                                                                                    | X                    | <input type="checkbox"/> | 32-34, 104-107 |
| <b>METHODS</b>                            |     |                                                                                                                                                                                                                                             |                      |                          |                |
| <b>Eligibility criteria</b>               | 8   | Specify the study characteristics (e.g., PICO, study design, setting, time frame) and report characteristics (e.g., years considered, language, publication status) to be used as criteria for eligibility for the review                   | X                    | <input type="checkbox"/> | 147-166        |
| <b>Information sources</b>                | 9   | Describe all intended information sources (e.g., electronic databases, contact with study authors, trial registers, or other grey literature sources) with planned dates of coverage                                                        | X                    | <input type="checkbox"/> | 147-166        |
| <b>Search strategy</b>                    | 10  | Present draft of search strategy to be used for at least one electronic database, including planned limits, such that it could be repeated                                                                                                  | X                    | <input type="checkbox"/> | 382            |
| <b>STUDY RECORDS</b>                      |     |                                                                                                                                                                                                                                             |                      |                          |                |
| Data management                           | 11a | Describe the mechanism(s) that will be used to manage records and data throughout the review                                                                                                                                                | X                    | <input type="checkbox"/> | 145, 175-176   |
| Selection process                         | 11b | State the process that will be used for selecting studies (e.g., two independent reviewers) through each phase of the review (i.e., screening, eligibility, and inclusion in meta-analysis)                                                 | X                    | <input type="checkbox"/> | 168-177        |
| Data collection process                   | 11c | Describe planned method of extracting data from reports (e.g., piloting forms, done independently, in duplicate), any processes for obtaining and confirming data from investigators                                                        | X                    | <input type="checkbox"/> | 179-192        |
| <b>Data items</b>                         | 12  | List and define all variables for which data will be sought (e.g., PICO items, funding sources), any pre-planned data assumptions and simplifications                                                                                       | X                    | <input type="checkbox"/> | 183-192        |
| <b>Outcomes and prioritization</b>        | 13  | List and define all outcomes for which data will be sought, including prioritization of main and additional outcomes, with rationale                                                                                                        | X                    | <input type="checkbox"/> | 183-192        |
| <b>Risk of bias in individual studies</b> | 14  | Describe anticipated methods for assessing risk of bias of individual studies, including whether this will be done at the outcome or study level, or both; state how this information will be used in data synthesis                        | X                    | <input type="checkbox"/> | 194-205        |
| <b>DATA</b>                               |     |                                                                                                                                                                                                                                             |                      |                          |                |
| <b>Synthesis</b>                          | 15a | Describe criteria under which study data will be quantitatively synthesized                                                                                                                                                                 | X                    | <input type="checkbox"/> | 207-220        |
|                                           | 15b | If data are appropriate for quantitative synthesis, describe planned summary measures, methods of handling data, and methods of combining data from studies, including any planned exploration of consistency (e.g., $I^2$ , Kendall's tau) | X                    | <input type="checkbox"/> | 207-220        |

| Section/topic                            | #   | Checklist item                                                                                                              | Information reported     |                          | Line number(s)   |
|------------------------------------------|-----|-----------------------------------------------------------------------------------------------------------------------------|--------------------------|--------------------------|------------------|
|                                          |     |                                                                                                                             | Yes                      | No                       |                  |
|                                          | 15c | Describe any proposed additional analyses (e.g., sensitivity or subgroup analyses, meta-regression)                         | X                        | <input type="checkbox"/> | 217-220          |
|                                          | 15d | If quantitative synthesis is not appropriate, describe the type of summary planned                                          | X                        | <input type="checkbox"/> | 208-210, 222-254 |
| <b>Meta-bias(es)</b>                     | 16  | Specify any planned assessment of meta-bias(es) (e.g., publication bias across studies, selective reporting within studies) | <input type="checkbox"/> | X                        |                  |
| <b>Confidence in cumulative evidence</b> | 17  | Describe how the strength of the body of evidence will be assessed (e.g., GRADE)                                            | <input type="checkbox"/> | X                        |                  |



# BMJ Open

## Adolescent self-consent for vaccinations: protocol for a mixed methods systematic review

|                                 |                                                                                                                                                                                                                                                                                                                                                                                |
|---------------------------------|--------------------------------------------------------------------------------------------------------------------------------------------------------------------------------------------------------------------------------------------------------------------------------------------------------------------------------------------------------------------------------|
| Journal:                        | <i>BMJ Open</i>                                                                                                                                                                                                                                                                                                                                                                |
| Manuscript ID                   | bmjopen-2017-021335.R2                                                                                                                                                                                                                                                                                                                                                         |
| Article Type:                   | Protocol                                                                                                                                                                                                                                                                                                                                                                       |
| Date Submitted by the Author:   | 19-Apr-2018                                                                                                                                                                                                                                                                                                                                                                    |
| Complete List of Authors:       | Batista, Harriet; University of Bristol, Population Health Sciences: Bristol Medical School<br>Hickman, M; University of Bristol, Population Health Sciences: Bristol Medical School<br>Macleod, John; University of Bristol, Population Health Sciences: Bristol Medical School<br>Audrey, Suzanne; University of Bristol, Population Health Sciences: Bristol Medical School |
| <b>Primary Subject Heading</b>: | Infectious diseases                                                                                                                                                                                                                                                                                                                                                            |
| Secondary Subject Heading:      | Public health, Qualitative research                                                                                                                                                                                                                                                                                                                                            |
| Keywords:                       | Self-consent, Vaccination, Systematic review, Mixed methods, Adolescents                                                                                                                                                                                                                                                                                                       |
|                                 |                                                                                                                                                                                                                                                                                                                                                                                |

SCHOLARONE™  
Manuscripts

View Only

1  
2  
3  
4  
5  
6  
7  
8  
9  
10  
11  
12  
13  
14  
15  
16  
17  
18  
19  
20  
21  
22  
23  
24  
25  
26  
27  
28  
29  
30  
31  
32  
33  
34  
35  
36  
37  
38  
39  
40  
41  
42  
43  
44  
45  
46  
47  
48  
49  
50  
51  
52  
53  
54  
55  
56  
57  
58  
59  
60

1 **TITLE: Adolescent self-consent for vaccinations: protocol for a mixed methods systematic review**

2

3 Dr Harriet Batista Ferrer, Population Health Sciences, Bristol Medical School, University of Bristol.

4 Professor Matthew Hickman, Population Health Sciences, Bristol Medical School, University of

5 Bristol.

6 Professor John Macleod, Population Health Sciences, Bristol Medical School, University of Bristol.

7 Dr Suzanne Audrey, Population Health Sciences, Bristol Medical School, University of Bristol.

8

9 **Corresponding author:**

10 Dr Harriet Batista Ferrer

11 Senior Research Associate

12 Population Health Sciences, Bristol Medical School

13 University of Bristol

14 Canynge Hall

15 Whatley Road

16 Bristol BS8 2PS

17 Email: Harriet.Batista@bristol.ac.uk

18 Telephone: +44 (0) 117 928 7223

19

20 **Word count: 2,219**

21

22 **Key words**

23 Self-consent, Vaccination, Systematic review, Adolescents, Mixed Methods

24

1  
2  
3 25 **ABSTRACT**  
4

5 26 **Introduction:** The recent global expansion of routine adolescent vaccination programmes has the  
6  
7 27 potential to protect young people against the acquisition of infectious disease and improve their  
8  
9 28 health. Although in many countries the legal framework supports young people to provide consent  
10  
11 29 for medical interventions if they are considered competent, written parental consent can act as a  
12  
13 30 barrier to uptake as it is frequently a condition of adolescent vaccination programmes. The aim of  
14  
15 31 this systematic review protocol is to document the methods which will be used to identify, appraise  
16  
17 32 and synthesise the available qualitative and quantitative evidence to address: (i) whether  
18  
19 33 implementation of adolescent self-consent procedures can increase vaccination uptake, and; (ii) the  
20  
21 34 barriers and facilitators to implementation of adolescent self-consent procedures.  
22

23  
24 35 **Methods and analysis:** Comprehensive search strategy of all relevant electronic databases for both  
25  
26 36 qualitative and quantitative studies using predefined inclusion and exclusion criteria. At least two  
27  
28 37 authors will independently review titles and abstracts, extract data and assess the methodological  
29  
30 38 quality of eligible primary studies, resolving disagreements by consensus. Quantitative studies will  
31  
32 39 be reported narratively and where possible pooled in a meta-analysis using a random-effects model.  
33  
34 40 The findings of qualitative primary studies will be extracted, interpreted and synthesised to identify  
35  
36 41 overarching themes as well as similarities and differences within those themes.  
37

38  
39 42 **Ethics and dissemination:** As this systematic review involves analysis of secondary data, the study  
40  
41 43 does not require ethical approvals. We will use our findings to assess whether the evidence supports  
42  
43 44 the hypothesis that self-consent procedures can increase coverage of adolescent vaccination  
44  
45 45 programmes. We will identify barriers and facilitators to the implementation of adolescent self-  
46  
47 46 consent for vaccination, and make recommendations for policy-makers and practitioners in relation  
48  
49 47 to consent procedures within vaccination programmes for young people.  
50

51 48 **Systematic review registration:** PROSPERO CRD42017084509  
52

53 49 **Word count:** 284  
54  
55  
56  
57  
58  
59  
60

1  
2  
3 51 **Strengths and limitations of this study**  
4

5 52 • The mixed methods systematic review will answer complementary research questions about  
6  
7 53 self-consent for adolescent vaccination programmes  
8

9 54 • Robust systematic review methodology will be used to identify, appraise and synthesise the  
10  
11 55 relevant qualitative and quantitative literature  
12

13 56 • Lack of primary studies and heterogeneity of eligible studies in terms of study design, population  
14  
15 57 and reporting may limit our ability to infer conclusions in relation to the research questions  
16  
17

18 58  
19  
20  
21  
22  
23  
24  
25  
26  
27  
28  
29  
30  
31  
32  
33  
34  
35  
36  
37  
38  
39  
40  
41  
42  
43  
44  
45  
46  
47  
48  
49  
50  
51  
52  
53  
54  
55  
56  
57  
58  
59  
60

## 59 INTRODUCTION

60 In recent years, the number of routine vaccinations recommended during adolescence have  
61 increased, and include vaccines that protect against tetanus, diphtheria, meningitis and human  
62 papillomavirus (HPV) acquisition [1, 2]. Provided sufficient coverage is achieved, the expansion of  
63 adolescent vaccination programmes may improve young people's health by protecting them from  
64 potentially life- threatening infectious diseases.

65  
66 The introduction of new adolescent vaccination programmes is relevant to the debate about young  
67 people's capacity to provide consent to receive medical treatment. The United Nations Convention  
68 on the Rights of the Child recognises the right for all children and young people to participate in  
69 decision-making processes which involve them [3]. However, the World Health Organisation (WHO)  
70 has acknowledged difficulties over consent for vaccination of adolescents because of their age, and  
71 describes current practice through which countries are encouraged to adopt procedures that ensure  
72 parents have been informed and agreed to the vaccination [4].

73  
74 In most countries, the legal framework for consent requires parental or guardian permission for  
75 young people aged below 18 years [4]. However, the age of consent for medical interventions, such  
76 as vaccination programmes, is lower in some countries. In the United Kingdom (UK), Canada and  
77 Sweden young women are legally able to override parental decisions if they are considered mature  
78 enough to make, and understand the consequences of, the decision to vaccinate. In Australia and  
79 the United States of America (USA) there are geographic variations of the age (12 to 17 years) that a  
80 young person can consent to be vaccinated. Despite young people being supported by the law to  
81 provide consent themselves, written parental consent is usually sought. In relation to the HPV  
82 vaccination programme, this has been shown to act as an important barrier preventing young  
83 women (usually aged 12 to 13 years) receiving the Human Papillomavirus (HPV) vaccine, with

1  
2  
3 84 implications for vaccination programme coverage [5, 6]. Furthermore, it is a barrier with potential to  
4  
5 85 reinforce health inequalities since lack of written parental consent may also be related to lower  
6  
7 86 socioeconomic status and some ethnic groups [5, 7].  
8  
9

10 87 To examine the issue of self-consent for the HPV vaccine in more detail, a mixed-methods study has  
11  
12 88 been funded by the National Institute for Health Research (NIHR) Research for Patient Benefit  
13  
14 89 Programme (RfPB) in England. The study is examining the practicality, acceptability and impact of  
15  
16 90 implementing new self-consent procedures for the schools-based HPV vaccination in two local  
17  
18 91 authorities in the south-west of England [8]. There are three elements to the study: statistical  
19  
20 92 analyses of routine data to assess the impact of self-consent on overall uptake levels and in relation  
21  
22 93 to socio-economic status, ethnicity and type of school; a process evaluation to examine the context,  
23  
24 94 implementation and response to the new consent procedures, and; a systematic review of the  
25  
26 95 evidence relating to self-consent for adolescent vaccines. The current protocol focusses on the  
27  
28 96 systematic review which will run alongside, and inform, the other elements of the study.  
29  
30

31 97

32  
33 98 An initial scoping search suggested a paucity of peer-reviewed evidence in relation to self-consent  
34  
35 99 procedures for HPV vaccination programmes. Since issues relating to self-consent for the HPV  
36  
37 100 vaccination are likely to be relevant for other vaccinations delivered during adolescence we widened  
38  
39 101 the scope of the systematic review to identify and collate the evidence across all adolescent  
40  
41 102 vaccination programmes. We chose to restrict to vaccination programmes, rather than include  
42  
43 103 studies related to healthcare in general, to ensure the findings were relevant to the programme of  
44  
45 104 research described above. Therefore, the aim of this mixed-methods systematic review is to identify,  
46  
47 105 appraise and synthesise the available qualitative and quantitative literature to gain understanding as  
48  
49 106 to: (i) whether implementation of adolescent self-consent procedures can increase vaccination  
50  
51 107 uptake, and; (ii) the related barriers and facilitators to implementation of adolescent self-consent  
52  
53 108 procedures.  
54  
55  
56  
57  
58  
59  
60

1  
2  
3 1094  
5 110 **METHODS AND ANALYSIS**

6  
7 111 We are using mixed methods methodology within this systematic review to answer complementary  
8  
9 112 research questions within one study. In addition to answering questions of the effectiveness of self-  
10  
11 113 consent interventions at increasing uptake of adolescent vaccination programmes, the systematic  
12  
13 114 review will also synthesise qualitative research comprising the views of young people and relevant  
14  
15 115 stakeholders to gain understanding of how self-consent procedures can be implemented effectively  
16  
17 116 to increase uptake [9]. The findings from the qualitative and quantitative studies will be integrated  
18  
19 117 to produce recommendations for future policy and practice [9].  
20

21  
22 118

23  
24 119 This review protocol was prepared using the Preferred Reporting Items for Systematic Reviews and  
25  
26 120 Meta-Analyses (PRISMA) Protocol guidelines [10] (Supplementary file 1) and has been registered  
27  
28 121 with the International Prospective Register of Systematic Reviews (PROSPERO) (Registration  
29  
30 122 number: CRD42017084509).  
31

32 123

33  
34 124 **Search strategy**

35  
36 125 A comprehensive search strategy has been developed to capture all literature relevant to adolescent  
37  
38 126 self-consent procedures for vaccination programmes by a reviewer (HB-F) experienced in  
39  
40 127 undertaking systematic reviews in the proposed research field and discussed with members of the  
41  
42 128 research team. The original search strategy developed for the Embase database has been adapted  
43  
44 129 for each included database (see below) and comprises a combination of text words and the  
45  
46 130 following medical subject headings (MeSH) indexing terms: 'child', 'adolescent', 'active  
47  
48 131 immunization', 'immunization', 'immunization programs', 'mass immunization', 'revaccination',  
49  
50 132 'vaccination', 'diphtheria vaccine', 'diphtheria tetanus vaccine', 'diphtheria pertussis tetanus',  
51  
52 133 'haemophilus influenzae type b vaccine', 'hepatitis b vaccine', 'meningococcus vaccine', 'rubella  
53  
54 134 vaccine', 'wart virus vaccine', 'papillomavirus vaccines', 'decision making', 'informed consent',  
55  
56  
57  
58  
59  
60

1  
2  
3 135 'parental consent', 'treatment refusal' (Table 1). Study design filters or restrictions by setting will not  
4  
5 136 be applied as the study aims to be inclusive in relation to study design and settings eligible for  
6  
7 137 inclusion.  
8

9 138

#### 10 11 139 **Databases**

12  
13 140 To ensure all the relevant literature is captured, we will search the following ten databases from  
14  
15 141 inception to January 2018 and re-run six months later (June 2018) to inform the wider research  
16  
17 142 study as it progresses: Child Development & Adolescent Studies via EBSCOhost, Cochrane Central  
18  
19 143 Register of Controlled Trials via The Cochrane Library, Cochrane Reviews via The Cochrane Library,  
20  
21 144 Cumulative Index to Nursing and Allied Health Literature via EBSCOhost, Embase via Ovid, Health  
22  
23 145 Technology Assessment Database, Medline via Ovid, PsycINFO via Ovid, Social Care Online via Social  
24  
25 146 Care Institute for Excellence and Web of Science Core Collection: Social Sciences Citation Index and  
26  
27 147 Conference Proceedings Citation Index- Science. All abstracts will be saved using Endnote X8.  
28

29  
30 148

#### 31 32 149 **Inclusion and exclusion criteria**

33  
34 150 Quantitative studies will be eligible if vaccine uptake following implementation of self-consent  
35  
36 151 procedures is reported for young people aged between ten and 18 years [11]. Qualitative studies  
37  
38 152 reporting the views and experiences of key stakeholders in relation adolescent self-consent  
39  
40 153 procedures will also be included. Studies related to consent procedures solely targeting parents of  
41  
42 154 adolescents, or early childhood and adult vaccination programmes will not be eligible for inclusion.  
43  
44 155 Relevant stakeholders will vary with context but are likely to include young people, parents or  
45  
46 156 primary care givers, healthcare professionals, policy makers, community leaders and teachers.  
47  
48

49 157

50  
51 158 We will include a range of study designs. To determine whether self-consent procedures can  
52  
53 159 increase uptake of vaccination programmes, primary studies reporting parallel group randomised  
54  
55 160 controlled trials, quasi-randomised trials, non-randomised controlled trials, controlled before and  
56  
57  
58  
59  
60



1  
2  
3 161 after studies, historically controlled studies, and retrospective or prospective cohort studies that  
4  
5 162 include a control group will be eligible. Qualitative studies which use interviews, focus groups,  
6  
7 163 observations, or open-ended questions allowing free-text responses in questionnaires will be  
8  
9 164 included to explore views and behaviours related to young people's self-consent for vaccination.

10  
11 165

12  
13 166 Conference abstracts, reviews, editorials, opinion pieces, dissertations, letters and books will only be  
14  
15 167 included if they present original data. There will be no language or country of origin restriction  
16  
17 168 imposed, and any relevant full text paper that is not written in English will be translated.

18  
19 169

## 20 21 22 170 **Study selection**

23  
24 171 Two reviewers will independently assess the titles and abstracts against the predefined eligibility  
25  
26 172 criteria. Full-text publications of all potentially relevant articles will be retrieved and examined for  
27  
28 173 relevance. Any disagreements arising will be resolved by discussion. The reference lists and  
29  
30 174 bibliographies from relevant studies and systematic reviews will be hand-searched for additional  
31  
32 175 primary studies not retrieved by the electronic search.

33  
34 176

35  
36 177 We will use the reference management software EndNote X8 to remove duplicates and sort  
37  
38 178 exclusions and inclusions. The search strategy and study selection process will be documented using  
39  
40 179 a PRISMA flow diagram [12].

41  
42 180

## 43 44 45 181 **Data extraction**

46  
47 182 At least two reviewers will independently extract data from selected studies using structured and  
48  
49 183 standardised data extraction forms used in our previous qualitative and quantitative systematic  
50  
51 184 reviews. In instances where multiple publications relate to the same study, these will be reported  
52  
53 185 together. The following domains will be retrieved: study characteristics (authors, publication year,  
54  
55 186 country, aim, study time period, study design, location, type of setting, data collection period, data

1  
2  
3 187 collection method, sampling strategy, analysis, participant characteristics (participant age, sample  
4  
5 188 size, vaccination status of participants, socioeconomic indicators, race/ethnicity, gender, and  
6  
7 189 religion) and study results (uptake of vaccine, psychological outcomes, healthcare service use,  
8  
9 190 incidence of vaccine preventable disease, views and behaviours related to self-consent procedures,  
10  
11 191 authors' reported conflicts of interest and study funding sources). We will also record data relating  
12  
13 192 to the possible harms resulting from self-consent procedures (e.g. conflict with parents, healthcare  
14  
15 193 professional anxiety). Where possible, authors will be contacted for missing or incomplete data.  
16  
17 194 Disagreements will be resolved through discussion.  
18  
19  
20  
21  
22

195

### 196 **Risk of bias and quality assessment**

197 For eligible primary studies, quality assessment will be undertaken to illustrate potential sources of  
198 bias. As we anticipate the majority of eligible studies will be observational, studies will not  
199 automatically be excluded on the basis of 'low' quality assessment if they are considered to  
200 contribute relevant information. We propose using: the Cochrane Collaboration's handbook for the  
201 assessment of risks of bias for systematic review of randomised controlled studies and quasi-  
202 randomised intervention studies [13] Risk Of Bias in Non Randomised Studies of Interventions  
203 (ROBINS-I) [14] ;, the NIH Quality Assessment Tool for Observational Cohort and Cross-Sectional  
204 Studies [15], and; the Critical Appraisal Skills Programme criteria adapted for qualitative studies for  
205 evaluating qualitative research [16]. Quality assessment of primary studies will be undertaken  
206 independently by two reviewers and recorded in an excel spreadsheet. An overall assessment of  
207 'high', 'medium', 'low', or 'unclear' will be assigned and reported.  
208

209

### 209 **Data synthesis: Quantitative studies**

210 We anticipate that the primary quantitative studies will be reported narratively as preliminary  
211 searches specifically related to HPV vaccination programmes indicated a lack of published studies  
212 and the likelihood of heterogeneity in relation to study design and reported outcomes. However, if

1  
2  
3 213 sufficiently similar studies are captured we will consider combining individual study results through  
4  
5 214 meta-analyses. To assess the heterogeneity between studies, we will use the Q-statistic and the  $I^2$ -  
6  
7 215 statistics [17]. Evidence of heterogeneity will be classified as weak, moderate and strong for  
8  
9 216 corresponding  $I^2$  of 25%, 50% and 75% respectively. If heterogeneity between studies is classified as  
10  
11 217 weak, analyses will comprise adjusted odds ratios (aORs) where available, with unadjusted odds  
12  
13 218 ratios used if not reported. Analyses will be undertaken using the meta-analysis function [18]  
14  
15 219 available in Stata 15. We do not anticipate sufficient data being available to undertake sub-group  
16  
17 220 analyses. However, if sufficient data were reported we propose two sub-group analyses to compare  
18  
19 221 impact of self-consent procedures by: (i) setting (healthcare vs. school) and (ii) age of participants  
20  
21 222 (less than 14 years old vs. 14 years and greater).  
22  
23  
24

223

#### 224 **Data synthesis: Qualitative studies**

225 The socio-ecological model [19] considers that behaviour is shaped by a complex interaction  
226 between factors operating at public policy, community, organisational, interpersonal and  
227 intrapersonal levels. In a previous qualitative synthesis, we have shown that young women's access  
228 to the HPV vaccine is shaped by decisions at different levels of the socio-ecological model [5]. During  
229 the analysis, we will use the socio-ecological model to provide a framework for understanding how  
230 barriers and facilitators operating at different levels of the model can provide access to, or prevent,  
231 young people self-consenting in the context of vaccination programmes.  
232

232

233 To analyse the qualitative data, the methodology for thematic synthesis reported by Thomas and  
234 Harden [20], assisted by the Framework method of qualitative data management [21], will be used.

235 These methods are suited to studies with *a priori* aims and objectives. The overall purpose of the  
236 synthesis will be to 'pool' the results from individual primary studies by initially separating the  
237 findings, coding and interpreting the text, and then combining them through the identification of key  
238 themes across the studies as well as similarities and differences within those themes [22]. Thematic

239 synthesis will be led by one reviewer reporting to the wider team about interpretation of the data as  
240 analysis progresses.

241

242 Familiarisation with the dataset will begin with reading the full papers. Pertinent sections of the text  
243 reported in each primary study will represent the basic units for analysis. Primary charts of the text  
244 will be constructed around key issues using the Framework Matrix within QSR NVivo10 software. For  
245 example, initial charts are likely to focus on 'barriers' and 'facilitators' to adolescent self-consent.  
246 The primary charts will be retained and revisited as required. Streamlined versions will be produced  
247 as the process of coding, summarising and synthesising the data progresses. In subsequent charts,  
248 key terms and phrases will be retained while repetition within studies and extraneous text are  
249 removed. During this process, overarching themes will be identified, and differences or similarities  
250 explored within these emerging themes.

251

### 252 **Data synthesis: Interrogation**

253 The final stage of the analysis will aim, firstly, to test whether the recommendations developed from  
254 the qualitative studies have been addressed in evaluative studies retrieved for the review and,  
255 secondly, to examine whether interventions that match the recommendations result in higher  
256 uptake in vaccination [9].

257

### 258 **Patient and public involvement**

259 The Bristol Young People's Advisory Group (YPAG) comprises young people aged ten to 17 years who  
260 are interested in healthcare and research. They meet regularly to help researchers with their  
261 projects and have been consulted about the design of the wider study and participant materials.  
262 They will also be invited to an event at the end of the study to consider findings and  
263 recommendations with the young people, parents, immunisation nurses and school staff involved in  
264 the study.

1  
2  
3 2654  
5 266 **ETHICS AND DISSEMINATION**

6  
7 267 We will not seek ethical approval for this study because the secondary data to be collected cannot  
8  
9 268 be linked to individuals. As far as we are aware, this will be the first systematic review to collate  
10  
11 269 evidence in relation to adolescent self-consent procedures for vaccination programmes. The review  
12  
13 270 comprises part of a larger study. The findings of this review will inform the larger study evaluating  
14  
15 271 the practicality, acceptability and impact of new self-consent procedures for the schools-based HPV  
16  
17 272 vaccination programme in the UK. Findings will also be used to make recommendations to improve  
18  
19 273 self-consent procedures for young people in vaccination programmes. We anticipate the results of  
20  
21 274 this study this may be of interest to national and international stakeholders interested in improving  
22  
23  
24 275 uptake in adolescent vaccination programmes.  
25

26 276

27  
28 277 **FULL REFERENCES**

- 29  
30 278 1. World Health Organisation, Summary of WHO Position Papers - Recommendations for  
31 279 Routine Immunization, 2017. Available from -  
32 280 [http://www.who.int/immunization/policy/Immunization\\_routine\\_table1.pdf?ua=1](http://www.who.int/immunization/policy/Immunization_routine_table1.pdf?ua=1).  
33 281  
34 282 2. Public Health England, Green Book Chapter 11: The UK Immunisation Schedule, 2016.  
35 283 Available from -  
36 284 [https://www.gov.uk/government/uploads/system/uploads/attachment\\_data/file/554298/Green\\_Book\\_Chapter\\_11.pdf](https://www.gov.uk/government/uploads/system/uploads/attachment_data/file/554298/Green_Book_Chapter_11.pdf).  
37 285  
38 286  
39 287 3. Convention on the Rights of the Child. United Nations, Treaty Ser, 1989. **1577**.  
40 288  
41 289 4. World Health Organisation, Considerations regarding consent in vaccinating children and  
42 290 adolescents between 6 and 17 years old, 2014. Available from -  
43 291 [http://www.who.int/immunization/programmes\\_systems/policies\\_strategies/consent\\_note\\_en.pdf](http://www.who.int/immunization/programmes_systems/policies_strategies/consent_note_en.pdf).  
44 292  
45 293  
46 294 5. Batista Ferrer, H., et al., Barriers and facilitators to HPV vaccination of young women in high-  
47 295 income countries: a qualitative systematic review and evidence synthesis. BMC Public  
48 296 Health, 2014. **14**(1): p. 700.  
49 297  
50 298 6. Batista Ferrer, H., Factors Influencing the Uptake of the Human Papillomavirus (HPV)  
51 299 Vaccination Programme. PhD Thesis. University of Bristol, November 2014.  
52 300  
53  
54  
55  
56  
57  
58  
59

- 1  
2  
3 301 7. Batista Ferrer, H., et al., Barriers and facilitators to uptake of the school-based HPV  
4 302 vaccination programme in an ethnically diverse group of young women. *J Public Health (Oxf)*,  
5 303 2016. **38**(3): p. 569-577.  
6 304
- 7 305 8. Audrey, S., et al., Impact and acceptability of self-consent procedures for the school-based  
8 306 human papillomavirus vaccine: a mixed-methods study protocol. *BMJ Open*, 2018. **8**(3).  
9 307
- 10 308 9. Harden, A. and J. Thomas, Mixed methods and systematic reviews: examples and emerging  
11 309 issues. *Mixed Methods Handbook*, ed. A. Tashakkori and C. Teddlie. 2010, New York: Sage  
12 310 Publications.  
13 311
- 14 312 10. Moher, D., et al., Preferred reporting items for systematic review and meta-analysis  
15 313 protocols (PRISMA-P) 2015 statement. *Systematic Reviews*, 2015. **4**(1): p. 1.  
16 314
- 17 315 11. Young people's health—a challenge for society. Report of a WHO Study Group on young  
18 316 people and "Health for All by the Year 2000". *World Health Organ Tech Rep Ser*, 1986. **731**:  
19 317 p. 1-117.  
20 318
- 21 319 12. Moher, D., et al., Preferred reporting items for systematic reviews and meta-analyses: The  
22 320 PRISMA statement. *International Journal of Surgery*, 2010. **8**(5): p. 336-341.  
23 321
- 24 322 13. Higgins J, Green, S., *Cochrane Handbook for Systematic Reviews of Interventions*, 2011.  
25 323 Available from - <http://handbook.cochrane.org>.  
26 324
- 27 325 14. Sterne, J.A., et al., ROBINS-I: a tool for assessing risk of bias in non-randomised studies of  
28 326 interventions. *BMJ*, 2016. **355**.  
29 327
- 30 328 15. National Institute for Health Quality Assessment Tool for Observational Cohort and Cross-  
31 329 Sectional Studies, 2017. Available from - [https://www.nhlbi.nih.gov/health-topics/study-](https://www.nhlbi.nih.gov/health-topics/study-quality-assessment-tools)  
32 330 [quality-assessment-tools](https://www.nhlbi.nih.gov/health-topics/study-quality-assessment-tools).  
33 331
- 34 332 16. Public Health Resource Unit, *Critical Appraisal Skills Programme (CASP): appraisal tools*,  
35 333 1998. Available from - [http://www.york.ac.uk/inst/crd/index\\_guidance.htm](http://www.york.ac.uk/inst/crd/index_guidance.htm).  
36 334
- 37 335 17. Higgins, J. and S.G. Thompson, Quantifying heterogeneity in a meta-analysis. *Statistics in*  
38 336 *medicine*, 2002. **21**(11): p. 1539-1558.  
39 337
- 40 338 18. Sterne, J., M.J. Bradburn, and M. Egger, *Meta-Analysis in Stata™*, in *Systematic Reviews in*  
41 339 *Health Care*. 2008, BMJ Publishing Group. p. 347-369.  
42 340
- 43 341 19. McLeroy, K.R., et al., An ecological perspective on health promotion programs. *Health*  
44 342 *education quarterly*, 1988. **15**(4): p. 351-377.  
45 343
- 46 344 20. Thomas, J. and A. Harden, Methods for the thematic synthesis of qualitative research in  
47 345 systematic reviews. *BMC Medical Research Methodology*, 2008. **8**(1): p. 45.  
48 346
- 49 347 21. Ritchie J, Lewis .J., ed. *Qualitative research practice: a guide for social science students and*  
50 348 *researchers*. 2003, Sage: London.  
51 349
- 52 350 22. Estabrooks, C.A., P.A. Field, and J.M. Morse, Aggregating qualitative findings: an approach to  
53 351 theory development. *Qualitative Health Research*, 1994. **4**(4): p. 503-511.

- 1  
2  
3 352  
4 353 **LIST OF ABBREVIATIONS**  
5  
6 354 HPV: Human Papillomavirus  
7  
8 355 WHO: World Health Organisation  
9  
10 356 UK: United Kingdom  
11  
12 357 USA: United States of America  
13  
14 358 PRISMA: Preferred Reporting Items for Systematic Reviews and Meta-Analyses Protocol  
15  
16 359 PROSPERO: Prospective Register of Systematic Reviews  
17  
18 360 MeSH: Medical Subject Headings  
19  
20 361 STROBE: Strengthening the Reporting of Observational Studies in Epidemiology  
21  
22 362 aOR: Adjusted Odds Ratio  
23  
24 363 OR: Odds Ratio  
25  
26 364 YPAG: Young Person's Advisory Group  
27  
28  
29  
30

31 366 **AUTHORS' CONTRIBUTIONS**

32  
33 367 All authors were involved in the conception and design of the research. SA is Principal Investigator;  
34  
35 368 HB-F is study manager and lead researcher; JM and MH advise on systematic review methodology.  
36  
37 369 HB-F wrote the first draft and all authors contributed to the final version of the manuscript.  
38  
39  
40

41 371 **FUNDING STATEMENT**

42  
43 372 This work is supported by the National Institute for Health Research for Patient Benefit (NIHR RfPB)  
44  
45 373 programme (project number PB-PG-0416-20013). The work is also undertaken with the support of  
46  
47 374 the NIHR Health Protection Research Unit in Evaluation of Interventions. The work was also  
48  
49 375 undertaken with the support of The Centre for the Development and Evaluation of Complex  
50  
51 376 Interventions for Public Health Improvement (DECIPHer), a UKCRC Public Health Research Centre of  
52  
53 377 Excellence. Joint funding (MR/KO232331/1) from the British Heart Foundation, Cancer Research UK,  
54  
55  
56  
57  
58  
59  
60

1  
2  
3  
4  
5  
6  
7  
8  
9  
10  
11  
12  
13  
14  
15  
16  
17  
18  
19  
20  
21  
22  
23  
24  
25  
26  
27  
28  
29  
30  
31  
32  
33  
34  
35  
36  
37  
38  
39  
40  
41  
42  
43  
44  
45  
46  
47  
48  
49  
50  
51  
52  
53  
54  
55  
56  
57  
58  
59  
60

378 Economic and Social Research Council, Medical Research Council, the Welsh Government and the  
379 Wellcome Trust, under the auspices of the UK Clinical Research Collaboration, is gratefully  
380 acknowledged. The views and opinions expressed therein are those of the authors and do not  
381 necessarily reflect those of the NIHR RfPB Programme, the Department of Health, or Public Health  
382 England.

383

384 **COMPETING INTERESTS STATEMENT**

385 The authors declare there are no competing interests.

386

For peer review only



387 Table 1. Embase search strategy

1. child/
2. adolescent/
3. ( "Young people#" OR "young person#" OR "young offender#" OR adolescent# OR adolescence OR youth# OR minor# OR teen OR teens OR teenage OR teenaged OR teenager# OR juvenile# OR pupil# OR boy# OR girl# OR underage# OR daughter# or son# (school AND dropout#) OR (school AND "drop out#") OR "school aged").mp.
4. active immunization/
5. immunization/
6. immunization programs/
7. mass immunization/
8. revaccination/
9. vaccination/
10. diphtheria vaccine/
11. diphtheria tetanus vaccine/
12. diphtheria pertussis tetanus Haemophilus influenzae type b vaccine/
13. hepatitis B vaccine/
14. meningococcus vaccine/
15. rubella vaccine/
16. wart virus vaccine/
17. Papillomavirus Vaccines/
18. (cervical cancer or diphtheria or diphtheria or diphteria or DtaP or DTP or Hep B or hepatitis or HPV or measles or MenC or MenACWY or meningitis or Meningococcal or Neisseria meningitidis or papillomavirus or pertus\* or rubella or rubeola or td?ipv or tetanus or wart virus or whoop\*).tw.
19. (policy OR program\*)

- 1  
2  
3  
4  
5  
6  
7  
8  
9  
10  
11  
12  
13  
14  
15  
16  
17  
18  
19  
20  
21  
22  
23  
24  
25  
26  
27  
28  
29  
30  
31  
32  
33  
34  
35  
36  
37  
38  
39  
40  
41  
42  
43  
44  
45  
46  
47  
48  
49  
50  
51  
52  
53  
54  
55  
56  
57  
58  
59  
60
20. (immuniz\* OR immunis\* OR immunother\* OR inoculat\* OR innoculat\* OR prophyla\* OR revaccinat\* OR vaccin\*).mp.
21. Decision making/
22. Informed consent/
23. Parental consent/
24. Treatment refusal/
25. (assent\* OR competen\* OR decision-making OR decision making OR Gillick OR Fraser OR inform\* consent OR mental capacity OR minor consent OR parent\* consent OR permission\* OR presume\* consent OR treatment refusal OR self consent OR self-consent OR opt-out OR opt-in).mp.
26. 1 or 2 or 3
27. 4 or 5 or 6 or 7 or 8 or 9 or 10 or 11 or 12 or 13 or 14 or 15 or 16 or 17
28. 18 and 20
29. 19 and 20
30. 27 or 28 or 29
31. 21 or 22 or 23 or 24 or 25
32. 26 and 30 or 31

388

## PRISMA-P 2015 Checklist

This checklist has been adapted for use with systematic review protocol submissions to BioMed Central journals from Table 3 in Moher D et al: Preferred reporting items for systematic review and meta-analysis protocols (PRISMA-P) 2015 statement. *Systematic Reviews* 2015 4:1

An Editorial from the Editors-in-Chief of *Systematic Reviews* details why this checklist was adapted - Moher D, Stewart L & Shekelle P: Implementing PRISMA-P: recommendations for prospective authors. *Systematic Reviews* 2016 5:15

| Section/topic                     | #  | Checklist item                                                                                                                                                                                  | Information reported     |                          | Line number(s) |
|-----------------------------------|----|-------------------------------------------------------------------------------------------------------------------------------------------------------------------------------------------------|--------------------------|--------------------------|----------------|
|                                   |    |                                                                                                                                                                                                 | Yes                      | No                       |                |
| <b>ADMINISTRATIVE INFORMATION</b> |    |                                                                                                                                                                                                 |                          |                          |                |
| <b>Title</b>                      |    |                                                                                                                                                                                                 |                          |                          |                |
| Identification                    | 1a | Identify the report as a protocol of a systematic review                                                                                                                                        | X                        | <input type="checkbox"/> | 1              |
| Update                            | 1b | If the protocol is for an update of a previous systematic review, identify as such                                                                                                              | <input type="checkbox"/> | X                        |                |
| <b>Registration</b>               | 2  | If registered, provide the name of the registry (e.g., PROSPERO) and registration number in the Abstract                                                                                        | X                        | <input type="checkbox"/> | 48, 120-21     |
| <b>Authors</b>                    |    |                                                                                                                                                                                                 |                          |                          |                |
| Contact                           | 3a | Provide name, institutional affiliation, and e-mail address of all protocol authors; provide physical mailing address of corresponding author                                                   | X                        | <input type="checkbox"/> | 3-18           |
| Contributions                     | 3b | Describe contributions of protocol authors and identify the guarantor of the review                                                                                                             | X                        | <input type="checkbox"/> | 362-365        |
| <b>Amendments</b>                 | 4  | If the protocol represents an amendment of a previously completed or published protocol, identify as such and list changes; otherwise, state plan for documenting important protocol amendments | <input type="checkbox"/> | X                        |                |
| <b>Support</b>                    |    |                                                                                                                                                                                                 |                          |                          |                |
| Sources                           | 5a | Indicate sources of financial or other support for the review                                                                                                                                   | X                        | <input type="checkbox"/> | 367-377        |
| Sponsor                           | 5b | Provide name for the review funder and/or sponsor                                                                                                                                               | X                        | <input type="checkbox"/> | 367-377        |
| Role of sponsor/funder            | 5c | Describe roles of funder(s), sponsor(s), and/or institution(s), if any, in developing the protocol                                                                                              | X                        | <input type="checkbox"/> | 367-377        |
| <b>INTRODUCTION</b>               |    |                                                                                                                                                                                                 |                          |                          |                |
| <b>Rationale</b>                  | 6  | Describe the rationale for the review in the context of what is already known                                                                                                                   | X                        | <input type="checkbox"/> | 59-107         |

| Section/topic                             | #   | Checklist item                                                                                                                                                                                                                              | Information reported |                          | Line number(s) |
|-------------------------------------------|-----|---------------------------------------------------------------------------------------------------------------------------------------------------------------------------------------------------------------------------------------------|----------------------|--------------------------|----------------|
|                                           |     |                                                                                                                                                                                                                                             | Yes                  | No                       |                |
| <b>Objectives</b>                         | 7   | Provide an explicit statement of the question(s) the review will address with reference to participants, interventions, comparators, and outcomes (PICO)                                                                                    | X                    | <input type="checkbox"/> | 32-34, 104-107 |
| <b>METHODS</b>                            |     |                                                                                                                                                                                                                                             |                      |                          |                |
| <b>Eligibility criteria</b>               | 8   | Specify the study characteristics (e.g., PICO, study design, setting, time frame) and report characteristics (e.g., years considered, language, publication status) to be used as criteria for eligibility for the review                   | X                    | <input type="checkbox"/> | 147-166        |
| <b>Information sources</b>                | 9   | Describe all intended information sources (e.g., electronic databases, contact with study authors, trial registers, or other grey literature sources) with planned dates of coverage                                                        | X                    | <input type="checkbox"/> | 147-166        |
| <b>Search strategy</b>                    | 10  | Present draft of search strategy to be used for at least one electronic database, including planned limits, such that it could be repeated                                                                                                  | X                    | <input type="checkbox"/> | 382            |
| <b>STUDY RECORDS</b>                      |     |                                                                                                                                                                                                                                             |                      |                          |                |
| Data management                           | 11a | Describe the mechanism(s) that will be used to manage records and data throughout the review                                                                                                                                                | X                    | <input type="checkbox"/> | 145, 175-176   |
| Selection process                         | 11b | State the process that will be used for selecting studies (e.g., two independent reviewers) through each phase of the review (i.e., screening, eligibility, and inclusion in meta-analysis)                                                 | X                    | <input type="checkbox"/> | 168-177        |
| Data collection process                   | 11c | Describe planned method of extracting data from reports (e.g., piloting forms, done independently, in duplicate), any processes for obtaining and confirming data from investigators                                                        | X                    | <input type="checkbox"/> | 179-192        |
| <b>Data items</b>                         | 12  | List and define all variables for which data will be sought (e.g., PICO items, funding sources), any pre-planned data assumptions and simplifications                                                                                       | X                    | <input type="checkbox"/> | 183-192        |
| <b>Outcomes and prioritization</b>        | 13  | List and define all outcomes for which data will be sought, including prioritization of main and additional outcomes, with rationale                                                                                                        | X                    | <input type="checkbox"/> | 183-192        |
| <b>Risk of bias in individual studies</b> | 14  | Describe anticipated methods for assessing risk of bias of individual studies, including whether this will be done at the outcome or study level, or both; state how this information will be used in data synthesis                        | X                    | <input type="checkbox"/> | 194-205        |
| <b>DATA</b>                               |     |                                                                                                                                                                                                                                             |                      |                          |                |
| <b>Synthesis</b>                          | 15a | Describe criteria under which study data will be quantitatively synthesized                                                                                                                                                                 | X                    | <input type="checkbox"/> | 207-220        |
|                                           | 15b | If data are appropriate for quantitative synthesis, describe planned summary measures, methods of handling data, and methods of combining data from studies, including any planned exploration of consistency (e.g., $I^2$ , Kendall's tau) | X                    | <input type="checkbox"/> | 207-220        |

| Section/topic                            | #   | Checklist item                                                                                                              | Information reported     |                          | Line number(s)   |
|------------------------------------------|-----|-----------------------------------------------------------------------------------------------------------------------------|--------------------------|--------------------------|------------------|
|                                          |     |                                                                                                                             | Yes                      | No                       |                  |
|                                          | 15c | Describe any proposed additional analyses (e.g., sensitivity or subgroup analyses, meta-regression)                         | X                        | <input type="checkbox"/> | 217-220          |
|                                          | 15d | If quantitative synthesis is not appropriate, describe the type of summary planned                                          | X                        | <input type="checkbox"/> | 208-210, 222-254 |
| <b>Meta-bias(es)</b>                     | 16  | Specify any planned assessment of meta-bias(es) (e.g., publication bias across studies, selective reporting within studies) | <input type="checkbox"/> | X                        |                  |
| <b>Confidence in cumulative evidence</b> | 17  | Describe how the strength of the body of evidence will be assessed (e.g., GRADE)                                            | <input type="checkbox"/> | X                        |                  |
